## Title Page

**Title:** Association Between Glucagon-like Peptide-1 Receptor Agonist Use and Perioperative Aspiration: A Systematic Review and Meta-Analysis

Jasmin Elkin, BBiomed(Hons),<sup>1</sup> Siddharth Rele, BBiomedSc, MD, PhD, GDipSurgAnat,<sup>1</sup> Priya Sumithran, MBBS, PhD,<sup>3,4</sup> Michael Hii, MBBS, BMedSci, PGDipSurgAnat, FRACS,<sup>1</sup> Sharmala Thuraisingam, PhD, MBiostat, BEMech(Hons),<sup>1</sup> Tim Spelman, PhD, MBBS, BSc,<sup>1</sup> Tuong Phan, MBBS, DMedSci, PGDipClinUS, PGDipBiostat, FANZCA,<sup>2</sup> Peter Choong, MBBS, MD, FRACS, FAOrthA, FAAHM,<sup>1</sup> Michelle Dowsey, BHealthSci(Nursing), MEpi, PhD,<sup>1</sup> and Cade Shadbolt, MA<sup>1</sup>

<sup>1</sup>Department of Surgery, The University of Melbourne, St Vincent's Hospital Melbourne, Fitzroy, Victoria, Australia

<sup>2</sup>Department of Critical Care, The University of Melbourne, St Vincent's Hospital Melbourne, Anaesthesia and Acute Pain Medicine, Fitzroy, Australia

<sup>3</sup> Department of Surgery, School of Translational Medicine, Monash University, Melbourne, VIC 3004, Australia.

<sup>4</sup> Department of Endocrinology and Diabetes, Alfred Health, Melbourne, VIC 3004, Australia.

**Corresponding to:** Cade Shadbolt

Email: [cade.shadbolt@unimelb.edu.au](mailto:cade.shadbolt@unimelb.edu.au)

**Keywords:** glucagon-like peptide-1 receptor agonists; perioperative aspiration; perioperative period; pulmonary aspiration; residual gastric contents.

**Short title:** GLP-1 Receptor Agonists and Perioperative Aspiration Risk

## Summary

**Background:** Glucagon-like peptide-1 receptor agonists (GLP-1 RAs) are known to slow gastric emptying, however the association between GLP-1 RA use and perioperative aspiration risk is not known. This systematic review and meta-analysis aimed to summarise the evidence on whether GLP-1 RA exposure is associated with (1) pulmonary aspiration in patients undergoing procedures requiring anaesthesia or sedation, or (2) increased residual gastric contents among fasted patients.

**Methods:** A search of MEDLINE, EMBASE, Web of Science, and Cochrane Central ClinicalTrials.gov and WHO ICTRP registries (updated 13 Jan 2025), and citation tracking of included studies was performed (14 Jan 2025). Studies assessing perioperative pulmonary aspiration or residual gastric contents among fasted patients who were using any form of GLP-1 RA were included. Data was extracted independently and in duplicate. Pooled odds ratios (ORs) were estimated for each outcome using random effect meta-analysis. Certainty of the evidence for each outcome was assessed using the Grading of Recommendations Assessment, Development, and Evaluation framework.

**Results:** Of 9,010 screened studies, 28 observational studies were included in the analysis. In a meta-analysis of 9 studies involving 304,060 individuals and 481 cases of aspiration, GLP-1RA exposure was not associated with pulmonary aspiration (OR, 1.04; 95% CI, 0.87-1.25, low certainty evidence). In a meta-analysis of 18 studies involving 165,522 individuals and 3,831 cases of residual gastric contents, GLP-1RA exposure was positively associated with residual gastric contents despite appropriate fasting (OR, 5.96; 95% CI, 3.96-8.98, low certainty evidence). In a meta-analysis of 5 studies involving 1,706 individuals and 208 cases of residual gastric contents, withholding at least one dose of GLP-1 RA prior to a procedure was associated with

a lower odds of residual gastric contents (OR, 0.51; 95% CI, 0.33-0.81, very low certainty evidence). No studies measured the association between the time since last dose of GLP-1 RA and pulmonary aspiration.

**Conclusions:** Patients using GLP-1RAs are at heightened risk of presenting to surgery with residual gastric contents, though the available evidence does not indicate that this translates to an elevated risk of aspiration. Further research is needed to evaluate the risks and benefits of different strategies for managing these medications during the perioperative period.

## Introduction

Glucagon-like peptide-1 receptor agonists (GLP-1 RAs) are widely used for management of obesity and type 2 diabetes.<sup>1</sup> GLP-1 RAs are known to slow the rate of postprandial gastric emptying,<sup>2-4</sup> and there have been recent anecdotal accounts of patients who are taking these medications before surgery aspirating or having increased residual gastric contents despite appropriate fasting.<sup>5-14</sup> This has led various professional organisations to acknowledge that patients taking these medications may be at a heightened risk of pulmonary aspiration or regurgitation during the perioperative period.<sup>15-17</sup> In response, safety-related warnings regarding pulmonary aspiration risks in patients undergoing elective procedures were added to GLP-1 RA labels in November 2024.<sup>18</sup>

Currently, appropriate perioperative management strategies for patients using GLP-1 RAs remains uncertain. Several professional bodies have considered withholding GLP-1 RA medications before surgery, but emphasise that there is limited evidence available about effectiveness of this strategy.<sup>16, 19-21</sup> Moreover, concerns have been raised about the safety of requiring an extended period of withdrawal, which may result in worsening glycaemic control among patients managing type 2 diabetes.<sup>21-23</sup> Alternative strategies, including changing preoperative fasting guidance, using prokinetic agents, and implementing routine point-of-care ultrasound to mitigate risk have been considered, but their effectiveness also remains uncertain.<sup>21, 24</sup>

Previous systematic reviews have examined the risk of aspiration or residual gastric contents among GLP-1 RA users, however they have been limited to patients undergoing endoscopic procedures,<sup>25-27</sup> or those temporarily exposed to GLP-1 RAs

during the immediate perioperative period.<sup>28</sup> To address uncertainty, this systematic review aimed to summarise the available evidence on whether GLP-1 RA exposure is associated with: (1) pulmonary aspiration in patients undergoing procedures requiring anaesthesia or sedation, or (2) increased residual gastric contents among fasted patients. This review also aimed to synthesise the evidence on whether withholding GLP-1 RA medications is associated with reductions in the risk of perioperative aspiration or the presence of residual gastric contents in fasted patients.

## **Methods**

We conducted a systematic review and meta-analysis in line with our prespecified protocol (PROSPERO: CRD42024532229) and reported according to the Preferred Reporting Items for Systematic Reviews and Meta-Analyses (PRISMA) statement<sup>29</sup> and Meta-analyses Of Observational Studies in Epidemiology (MOOSE) reporting guidelines.<sup>30</sup> Deviations and clarifications to the initial protocol are presented in the supplement (online Supporting Information Table S1). During the review process, discordance between reviewers were resolved through discussion, or via adjudication by an additional reviewer if consensus could not initially be achieved.

## **Search strategy**

We searched MEDLINE, EMBASE, Web of Science, and Cochrane Central on 19 March 2024 and completed an updated search on 13 Jan 2025 (online Supporting Information Methods S1). The search was limited to studies published from 2005 onwards, as this was the year of the first approval of a GLP1-RA by the Food and Drug Administration. The ClinicalTrials.gov and WHO ICTRP registries were

searched on the same date for information on unpublished or ongoing studies.

Forward and backwards citation tracking of included studies was last updated on 14 Jan 2025 using an automated online platform that has been described previously.<sup>31</sup>

### **Selection criteria**

Randomised controlled trials and observational studies were eligible for inclusion if they reported on the association between preoperative GLP-1 RA use and risk of: (1) pulmonary aspiration in fasted patients undergoing anaesthesia or procedural sedation; or (2) residual gastric contents in fasted patients undergoing procedures requiring anaesthesia or procedural sedation or in healthy volunteers that had fasted for at least 6 hours from solid foods and at least 2 hours for clear liquids, in accordance with standard preoperative fasting requirements.<sup>32</sup>

Studies were excluded if fasting duration was not reported, except for studies involving elective procedures where fasting was assumed to be a requirement. We also excluded studies where the GLP1-RA was commenced in the immediate perioperative period (i.e., within 14 days prior to the procedure or outcome measurement). Non-English studies and conference abstracts were not eligible for inclusion. When multiple studies were derived from overlapping samples, each study was included in the narrative summary though only the study with the lowest risk of bias across all 6 domains was included in pooled estimates. When the same study has been reported across multiple publications, only the most recent publication was included. Ongoing or completed study without published results were identified during screening, but not included in the quantitative synthesis. Studies were screened independently and in duplicate (by JE and SR) using the Covidence

systematic review software.<sup>33</sup> Reasons for excluded studies were reported and study authors were contacted to provide further information if eligibility was unclear.

### **Outcome measures**

Pulmonary aspiration included both direct measures of perioperative aspiration or postoperative respiratory complications that were directly attributed to aspiration (e.g. aspiration pneumonitis). Other respiratory complications that were not specifically attributed to perioperative aspiration did not meet this outcome definition. Residual gastric content included gastric residue identified via direct visualisation during endoscopy of the upper gastrointestinal tract or gastric contents identified via ultrasound. Individual outcome definitions as described by the study authors are presented in the supplement (online Supporting Information Table S2-S3).

### **Data extraction and preparation**

Key study characteristics and outcome data were extracted from each of the included studies, independently and in duplicate (by CS and JE) using a structured data extraction template. Adjusted odds ratios (OR) were the preferred effect estimates included in the meta-analyses of both outcomes. For estimates relating to aspiration, adjusted measures of relative risk (RR) were treated as adjusted ORs as odds approximates risk for low event rates.<sup>34</sup> When adjusted estimates were not reported, unadjusted ORs were calculated from the reported number of aspiration events in patients with and without GLP-1 RA exposure. For studies with no events in at least one arm, we added a continuity correction value to both arms that was inversely proportional to the sample size of the other study arm.<sup>34, 35</sup> For estimates relating to residual gastric contents, adjusted RRs were not treated as analogous to

ORs, as this is a more common outcome. Study authors were contacted to provide adjusted ORs if multivariable analyses were reported alongside other measures of effect (online Supporting Information Table S4). When adjusted ORs could not be obtained, unadjusted ORs were calculated directly from the reported number of patients with residual gastric contents in exposed and unexposed groups.

### **Risk of bias**

Risk of bias assessment was conducted independently and in duplicate (by CS and JE) for each effect estimate rather than once per study.<sup>36</sup> For studies examining the association between preoperative GLP-1 RA exposure as compared to no exposure and the risk of pulmonary aspiration or residual gastric contents, we used a modified Quality in Prognosis Studies (QUIPS) tool.<sup>37,38</sup> For estimates of the association between withholding at least one dose of their GLP-1 RA and the study outcomes, we used the Risk Of Bias In Non-randomised Studies - of Interventions (ROBINS-I) tool. In line with ROBINS-I recommendations, studies judged to be at critical risk of bias were excluded from the meta-analyses.<sup>39</sup> For each of the included studies, bias due to confounding was evaluated by consideration of adjustment for important variables, including age, sex, body mass index (BMI), diabetes, ASA-physical status classification system, medications associated with delaying gastric emptying, and comorbidity burden.

### **Statistical analysis**

Effect estimates for pulmonary aspiration and residual gastric contents were pooled separately. Pooled odds ratios and 95% confidence intervals were calculated via random effect meta-analysis using the restricted maximum likelihood (REML)



heterogeneity variance estimator.<sup>40, 41</sup> Heterogeneity was assessed by estimating the  $I^2$  statistic. Funnel plots were assessed visually for evidence of small study bias, and the robustness of estimates to worst case publication bias was assessed by conducting meta-analyses including only non-affirmative studies.<sup>42</sup> Overall certainty of the evidence for each pooled estimate was evaluated in line with the GRADE (Grading of Recommendations, Assessment, Development, and Evaluations) non-contextualised approach, which accounts for risk of bias, inconsistency, indirectness, imprecision, and publication bias of the included studies not considering the clinical context.<sup>43</sup> All statistical analyses were performed using the *meta*, *metafor*, and *PublicationBias* packages in R Statistical Software (Version 4.3.2, R Core Team).<sup>44, 45</sup>

### **Subgroup analyses**

Two prespecified subgroup analyses were performed according to type of GLP-1 RA (i.e, study limited to once-weekly formulations vs study not limited to once-weekly formulations), and indication for GLP-1 RA (i.e, studies limited to patients with diabetes vs studies not limited to patients with diabetes). We performed a post-hoc subgroup analysis comparing studies limited to patients undergoing upper endoscopies to all other studies to examine whether the absence of association between GLP-1 RA exposure and pulmonary aspiration could be explained by altered intraoperative management following direct visualisation of residual gastric contents.

## **Results**

### **Study Selection and Characteristics**

The literature search identified 9,010 study records (Figure 1), from which 28 observational studies involving 466,373 patients were included in the meta-analysis (Table 1). Sixteen studies that were ongoing or completed without published results at the time of the final search are summarised separately in online Supporting Information Table S5.

### **Pulmonary Aspiration**

Eleven retrospective studies assessed pulmonary aspiration among 335,876 patients (Table 2). Of these studies, 6 (55%) included patients who underwent esophagogastroduodenoscopy (EGD), 1 (9%) included EGD and/or colonoscopies, 1 (9%) included mixed endoscopic procedures, 1 (9%) included total knee arthroplasty (TKA), and 2 (18%) involved other elective surgeries. Instances of pulmonary aspiration were identified from electronic medical records or administrative claims data (online Supporting Information Table S2). Three studies examined individuals undergoing similar procedures from the same administrative database. To avoid double counting of individuals,<sup>46</sup> the study with the lowest risk of bias across all 6 domains was included in the meta-analysis.

Nine studies were included in the meta-analysis (Figure 2a). These studies examined 304,060 individuals, of which 481 cases of pulmonary aspiration were identified (Table 3). Preoperative exposure to GLP-1 RAs was not associated with pulmonary aspiration (OR, 1.04; 95% CI, 0.87-1.25,  $I^2=0\%$ ) (Figure 2a). Evaluation of indirectness suggested potential concerns due to a large proportion of studies restricted to endoscopic procedures or patients with diabetes (Table 3). Visual inspection of funnel plot asymmetry did not indicate small study effects (online

Supporting Information Figure S1). Sensitivity analysis restricted to non-affirmative studies was not performed due to an absence of affirmative studies. All subgroup analyses were consistent with the primary analysis (online Supporting Information Figure S2-S4). Overall risk of bias was moderate to high (online Supporting Information Table S6). For most studies, bias was largely attributed to incomplete adjustment for important prespecified confounders (online Supporting Information Table S7). Overall certainty in the evidence was low (Table 3).

### **Residual Gastric Contents**

Twenty studies assessed residual contents (Table 2). Of these studies, 15 (75%) included patients who had undergone EGD procedures, 1 (5%) included various endoscopic procedures, 2 (10%) included other elective surgeries, and 2 (10%) included healthy volunteers. Residual gastric contents were identified via retrospective review of patient medical records for 15 studies involving endoscopic procedures, with the remaining 5 studies having measured residual gastric content prospectively using gastric ultrasound (online Supporting Information Table S3).

Eighteen studies were included in the meta-analysis (Figure 2b). These studies examined 165,522 individuals, of which 3,831 had residual gastric contents (Table 3). Preoperative GLP-1 RA exposure was associated with higher odds of residual gastric contents (OR, 5.96; 95% CI, 3.96-8.98;  $I^2=76%$ ) (Figure 2b), however this estimate was impacted by substantial heterogeneity. Although our certainty in evidence was increased due to the large effect, evaluation of indirectness suggested potential concerns due to a large proportion of studies restricted to endoscopic procedures (Table 3). Visual inspection of funnel plot asymmetry indicated that small

study effects may have inflated this estimate (online Supporting Information Figure S5), though a sensitivity analysis restricted to non-affirmative studies indicated that our pooled estimate was robust to even worse-case publication bias (OR, 3.38; 95% CI, 1.49-7.68) (online Supporting Information Figure S6-S7). Subgroup analysis indicated that GLP-1 RA exposure had a stronger association with residual gastric contents in studies of patient who had not undergone an upper endoscopic procedure compared to studies of other populations (online Supporting Information Figure S8). Despite this, both subgroups showed a large effect in the same direction. No other subgroup effects were identified (online Supporting Information Figure S9 and S10). Overall risk of bias was predominantly high (online Supporting Information Table S8). For most studies, bias was largely attributed to high concerns with study participation, outcome measurement, and incomplete adjustment for important prespecified confounders (online Supporting Information Table S9). Overall certainty in the evidence was low (Table 3).

### **Association Between Time Since Last Dose and Residual Gastric Contents**

Five observational studies assessed the association between the time since last dose of GLP-1RA medication and residual gastric contents (Table 2). These studies examined 1,706 patients who were using GLP-1 RA, of whom 208 had residual gastric contents (Table 3). Two of these studies examined a cohort using either weekly and daily dosed formulations, and the remaining studies were restricted to cohorts using weekly formulations (online Supporting Information Table S10).

All five studies were included in the meta-analysis (Figure 2c). Withholding at least one dose of GLP-1 RA prior to a procedure was associated with a lower odds of

residual gastric contents (OR, 0.51; 95% CI, 0.33-0.81;  $I^2=13\%$ ). However, evaluation of indirectness suggested potential concerns due to a more than half of studies being limited to upper to EGD procedures. Visual inspection of funnel plot asymmetry indicated that small study effects may have inflated this estimate (online Supporting Information Figure S11). Sensitivity analysis restricted to non-affirmative studies indicated that the direction of the pooled estimate remained robust to even worse-case publication bias, though the wider confidence intervals from this sensitivity analysis included the null value (OR, 0.67; 95% CI, 0.38-1.18) (online Supporting Information Figure S12-S13). Subgroup analysis of GLP-1 RA indication was not performed due to an absence of studies restricted to patients with diabetes. No other subgroup effects were identified (online Supporting Information Figure S14 and S15). Overall risk of bias across studies analysed was serious (online Supporting Information Table S11). Key concerns were attributed to potential bias due to residual confounding, participant selection, and outcome measurement. Overall certainty in the evidence was very low (Table 3). No studies measured the association between the time since last dose of GLP-1 RA and pulmonary aspiration.

## **Discussion**

In this systematic review and meta-analysis, we assessed data from 28 observational studies involving 466,373 patients to evaluate the relationship between GLP-1 RA use and risk of perioperative aspiration among patients undergoing elective procedures. Our findings indicate that patients using GLP-1 RAs prior to an elective procedure are at a higher risk of presenting with residual gastric contents

compared to those not using GLP-1 RAs. Despite this, the available evidence does not indicate that preoperative GLP-1 RA use is associated with risk of perioperative aspiration, and the relationship between withholding GLP-1 RAs before surgery and aspiration risk remains unstudied. Our analysis suggests that patients who withheld at least one dose of their GLP-1 RA before surgery were less likely to present with residual gastric contents, when compared to maintaining a regular dosing schedule, though this evidence was derived from five small observational studies that are inherently vulnerable to bias due to residual confounding. Importantly, available studies did not examine the potential risks of withholding these medications, such as glycaemic instability or abrupt increases in blood pressure.<sup>47</sup> Given the absence of direct evidence from randomised controlled trials relating to such risks, and the small absolute risk of aspiration following appropriate fasting, it remains unclear if routinely withholding GLP-1 RA medications is warranted prior to elective procedures.

These findings may provide some degree of reassurance to both patients and clinicians about the risk of aspiration among patients using GLP-1 RAs prior to elective procedures. However, some caution is warranted, given low certainty in the available evidence. High rates of residual gastric contents among these patients may be a cause for concern, independent of any assumed association with aspiration risk. Gastric residue may complicate procedures that require clear stomach visualisation, such as gastroscopy, potentially leading to aborted procedures due to inadequate gastric clearance. Aborted procedures expose patients to unnecessary anaesthetic risks while also adversely affecting the efficient of healthcare resources.<sup>48</sup> Consequently, these findings indicate that tailored guidance on the

perioperative management of GLP-1 RAs may be warranted for procedures reliant on an empty stomach even in the absence of heightened aspiration risk.

This review highlights the need for targeted research exploring the risks and benefits of strategies for managing GLP-1 RA medications prior to elective procedures. While several observational studies were identified by our search of ongoing studies, it is unclear whether their findings from additional observational studies will add to the current evidence in a way that alters clinical practice. Importantly, two ongoing randomised controlled trials focused on preoperative management of GLP-1 RAs were identified. One assessing the effect of withholding GLP-1 RAs on aspiration and increased residual gastric content risk (NCT06533527), and another assessing the effectiveness of a 24-hour clear liquid diet for reducing residual gastric contents (NCT06654219). Such trials are urgently needed to assess the efficacy and safety of these approaches, and of alternative strategies, such as use of promotility agents , or assessing aspiration risk via preoperative gastric ultrasound.<sup>24</sup> A rapid update to this review will be warranted once data is available from randomised controlled trials, as such evidence will be critical to informing recommendations presented in future clinical practice guidelines.

### **Limitations**

The findings of this review should be interpreted within the context of several limitations. First, there was heterogeneity in how outcomes were described across the included studies. This included differences in measurement methods, such as using endoscopy versus gastric ultrasound to assess gastric contents, and differences in outcome definitions, such as distinguishing between pulmonary

aspiration and aspiration pneumonitis. Second, the available evidence is drawn largely from populations undergoing upper endoscopies, a procedure that is unique insofar as it allows for intraoperative management to be altered following direct visualisation of residual gastric contents. While this may limit the applicability of our findings to patients undergoing most types of elective procedures, the clinical interpretation of the findings were consistent across subgroup analyses of studies limited to patients undergoing upper endoscopies. Third, an absence of studies with a pre-registered protocol raises concerns about potential selective analysis and reporting, though the findings appeared to be largely robust to publication bias. Fourth, none of the studies were judged to be a low risk of bias, which is reflected in the overall certainty of the evidence being low to very low. Finally, we excluded two potentially eligible studies that were not published in English.<sup>49, 50</sup> It is unclear if this exclusion is likely to have altered our findings.

## **Conclusion**

This systematic review and meta-analysis found that patients using GLP-1 RAs are at a heightened risk of presenting for surgery with residual gastric contents, though this does not necessarily indicate an increased risk of aspiration. The available evidence to support withholding GLP-1 RAs before surgery is derived from a small number of observational studies and is impacted by a high degree of uncertainty. Given the uncertainty of evidence and absence of randomised controlled trials, ongoing research is needed to evaluate the risks and benefits of different strategies for managing these medications during the perioperative period.



## **Acknowledgements**

### **Details of authors' contributions:**

JE and CS had full access to all the data in the study and take responsibility for the integrity of the data and the accuracy of the data analysis.

### **Competing Interests:**

PS reported a National Health and Medical Research Council (NHMRC) grant, paid to her institution, in the past 36 months; reported being a council member of the Australian and New Zealand Obesity Society (ANZOS) and a member of The Obesity Collective leadership group; and reported being a co-author on manuscripts with a medical writer provided by Novo Nordisk, Eli Lilly. CS reported receiving research support for investigator-initiated studies, paid to his institution, from Eli Lilly and St. Vincent's Hospital Research Foundation. MD reported receiving research support for investigator-initiated studies, paid to her institution, from Medical Research Future Fund, NHMRC, Eli Lilly, Victorian Orthopaedic Foundation, Australian Orthopaedic Association Research Foundation, HCF Foundation, University of Melbourne, St. Vincent's Hospital Research Foundation, and Arthritis & Osteoporosis Western Australia; reported receiving payment for provision of advice on guideline development for the Royal Australian College of General Practitioners; reported receiving a sitting fee as a member of the Osteoarthritis Clinical Research Group Data & Safety Monitoring Board; and reported being a Board Director of the Australian Orthopaedic Association Research Foundation. MH reported receiving honoraria for lecture to Pillars of Dermatology Practice Symposium; and being a Chairperson for the HOPE fund. PC reported receiving research support for investigator-initiated studies from Medacta, Eli Lilly, Medibank Private, HCF foundation, National Health, Medical Research Foundation, and Medical Research

Future Fund; received royalty fees from Kluwer; received consultancy fees from DePuy, Surgeon advisory board, Stryker Corporation, Johnson and Johnson, and Medacta; reported being on the Editorial Board for EFORT Reviews and Journal of Clinical Medicine, and reported being an international corresponding editor for JAAOS International. No other disclosures were reported.

**Funding/Support:** JE was supported to conduct this work by an Australian Government Research Training Program (RTP) Scholarship. No other funding or support was received.

## References

1. Jensterle M, Rizzo M, Haluzík M, Janež A. Efficacy of GLP-1 RA approved for weight management in patients with or without diabetes: a narrative review. *Advances in therapy*. 2022;39(6):2452-2467.
2. Aldawsari M, Almadani FA, Almuhammadi N, Algabsani S, Alamro Y, Aldhwayan M. The efficacy of GLP-1 analogues on appetite parameters, gastric emptying, food preference and taste among adults with obesity: Systematic review of randomized controlled trials. *Diabetes, Metabolic Syndrome and Obesity*. 2023:575-595.
3. Jensterle M, Ferjan S, Lezaic L, Socan A, Goricar K, Zaletel K, Janez A. Semaglutide delays 4-hour gastric emptying in women with polycystic ovary syndrome and obesity. *Diabetes, Obesity and Metabolism*. 2023;25(4):975-984.
4. Maselli D, Atieh J, Clark MM, et al. Effects of liraglutide on gastrointestinal functions and weight in obesity: a randomized clinical and pharmacogenomic trial. *Obesity*. 2022;30(8):1608-1620.
5. Beam W, Hunter Guevara L. Are serious anesthesia risks of semaglutide and other GLP-1 agonists under-recognized? Case reports of retained solid gastric contents in patients undergoing anesthesia. *Anesthesia Patient Safety Foundation (APSF Newsletter)*. 2023;38(2):69-71.
6. Girón-Arango L, Perlas A. Point-of-Care Gastric Ultrasound to Identify a Full Stomach on a Diabetic Patient Taking a Glucagon-Like Peptide 1 Receptor Agonist. *A&A Practice*. 2024;18(2):e01751.
7. Gulak MA, Murphy P. Regurgitation under anesthesia in a fasted patient prescribed semaglutide for weight loss: a case report. *Canadian Journal of Anesthesia/Journal canadien d'anesthésie*. 2023;70(8):1397-1400.
8. Kittner SL, Talbott AL, Vishneski SR, Narbaiza J, Shields JS. Retained Gastric Contents After Adequate Fasting Associated with GLP-1 Receptor Agonist Use: A Report of 3 Cases. *JBS Case Connector*. 2023;13(4):e23.
9. Klein SR, Hobai IA. Semaglutide, delayed gastric emptying, and intraoperative pulmonary aspiration: a case report. *Canadian Journal of Anesthesia/Journal canadien d'anesthésie*. 2023;70(8):1394-1396.
10. Preda V, Khoo SS-Y, Preda T, Lord RV. Gastroparesis with bezoar formation in patients treated with glucagon-like peptide-1 receptor agonists: potential relevance for bariatric and other gastric surgery. *BJS open*. 2023;7(1):zrac169.
11. Queiroz VNF, Falsarella PM, Chaves RCdF, Takaoka F, Socolowski LR, Garcia RG. Risk of pulmonary aspiration during semaglutide use and anesthesia in a fasting patient: a case report with tomographic evidence. *einstein (São Paulo)*. 2023;21:eRC0628.
12. Raven LM, Stoita A, Feller RB, Brown C, Greenfield JR. Delayed gastric emptying with perioperative use of glucagon-like peptide-1 receptor agonists. *The American Journal of Medicine*. 2023;136(12):e233-e234.
13. Weber M, Siddarthan I, Mack PF. Clinically significant emesis in a patient taking a long-acting GLP-1 receptor agonist for weight loss. *BJA*. 2023;131(2):e37-e39.
14. Wilson PR, Bridges KH, Wilson SH. Particulate gastric contents in patients prescribed glucagon-like peptide 1 receptor agonists after appropriate perioperative fasting: a report of 2 cases. *A&A Practice*. 2023;17(8):e01712.
15. ANZCA. Surgery warning on use of popular weight loss drugs. <https://www.anzca.edu.au/resources/media-releases/2023-media-releases/gastric-emptying-mr.pdf>. Accessed June 30, 2024.

16. ASA. American Society of Anesthesiologists Consensus-Based Guidance on Preoperative Management of Patients (Adults and Children) on Glucagon-Like Peptide-1 (GLP-1) Receptor Agonists. <https://www.asahq.org/about-asa/newsroom/news-releases/2023/06/american-society-of-anesthesiologists-consensus-based-guidance-421-on-preoperative>. Accessed June 30, 2024.
17. AGA. No data to support stopping GLP-1 agonists prior to elective endoscopy 2023. <https://gastro.org/news/gi-multi-society-statement-regarding-glp-1-agonists-and-endoscopy/>. Accessed June 30, 2024.
18. GLP-1 receptor agonist labelling updated with risk of pulmonary aspiration. *Reactions Weekly*. 2024;2034(1):3.
19. ANZCA. Clinical Practice Recommendation On Periprocedural Use Of GLP-1/GIP Receptor Agonists. <https://www.anzca.edu.au/news/glp-1-gip-receptor-agonists-clinical-practice-guid>. Accessed on July 05, 2024.
20. Hashash JG, Thompson CC, Wang AY. AGA rapid clinical practice update on the management of patients taking GLP-1 receptor agonists prior to endoscopy: communication. *Clinical Gastroenterology and Hepatology*. 2024;22(4):705-707.
21. Kindel TL, Wang AY, Wadhwa A, Schulman AR, Sharaiha RZ, Kroh M, et al. Multi-society clinical practice guidance for the safe use of glucagon-like peptide-1 receptor agonists in the perioperative period. *Surgical Endoscopy*. 2024:1-4.
22. Jalleh RJ, Rayner CK, Hausken T, Jones KL, Camilleri M, Horowitz M. Gastrointestinal effects of GLP-1 receptor agonists: mechanisms, management, and future directions. *The Lancet Gastroenterology & Hepatology*. 2024;9(10):957-964.
23. van Zuylen ML, Siegelaar SE, Plummer MP, Deane AM, Hermanides J, Hulst AH. Perioperative management of long-acting glucagon-like peptide-1 (GLP-1) receptor agonists: concerns for delayed gastric emptying and pulmonary aspiration. *BJA*. 2024.
24. Milder DA, Milder TY, Liang SS, Kam PCA. Glucagon-like peptide-1 receptor agonists: a narrative review of clinical pharmacology and implications for perioperative practice. *Anaesthesia*. 2024.
25. Facciorusso A, Ramai D, Dhar J, et al. Effects of Glucagon-Like Peptide-1 receptor agonists on upper gastrointestinal endoscopy: A meta-analysis. *Clinical Gastroenterology and Hepatology*. 2024.
26. Singh S, Rahman SH, Khan N, et al. Effects of glucagon-like peptide-1 receptor agonists on endoscopy outcomes: A systematic review & meta-analysis. *Gastrointestinal Endoscopy*. 2024.
27. Baig MU, Piazza A, Lahooti A, Johnson KE, Rangwani S, Gouda Z, et al. Glucagon-like peptide-1 receptor agonist use and the risk of residual gastric content and aspiration in patients undergoing gastrointestinal endoscopy: a systematic review and a meta-analysis. *Gastrointestinal Endoscopy*. 2024.
28. do Nascimento TS, Pereira RO, Maia E, et al. The impact of glucagon-like peptide-1 receptor agonists in the patients undergoing anesthesia or sedation: systematic review and meta-analysis. *Perioperative Medicine*. 2024;13(1):78.
29. Page MJ, McKenzie JE, Bossuyt PM, et al. The PRISMA 2020 statement: an updated guideline for reporting systematic reviews. *International journal of surgery*. 2021;88:105906.
30. Stroup DF, Berlin JA, Morton SC, et al. Meta-analysis of observational studies in epidemiology: a proposal for reporting. *JAMA*. 2000;283(15):2008-2012.
31. Haddaway NR, Grainger MJ, Gray CT. citationchaser: An R package and Shiny app for forward and backward citations chasing in academic searching. Zenodo, doi:10.5281/zenodo.4533747

32. Practice Guidelines for Preoperative Fasting and the Use of Pharmacologic Agents to Reduce the Risk of Pulmonary Aspiration: Application to Healthy Patients Undergoing Elective Procedures: An Updated Report by the American Society of Anesthesiologists Task Force on Preoperative Fasting and the Use of Pharmacologic Agents to Reduce the Risk of Pulmonary Aspiration\*. *Anesthesiology*. 2017;126(3):376-93.
33. Covidence systematic review software, Veritas Health Innovation, Melbourne, Australia. Available at [www.covidence.org](http://www.covidence.org).
34. Deeks JJ, Higgins JPT, Altman DG (editors). Chapter 10: Analysing data and undertaking meta-analyses. In: Higgins JPT, Thomas J, Chandler J, Cumpston M, Li T, Page MJ, Welch VA (editors). *Cochrane Handbook for Systematic Reviews of Interventions* version 6.4 (updated August 2023). Cochrane, 2023. Available from [www.training.cochrane.org/handbook](http://www.training.cochrane.org/handbook).
35. Sweeting MJ, Sutton AJ, Lambert PC. What to add to nothing? Use and avoidance of continuity corrections in meta-analysis of sparse data. *Statistics in medicine*. 2004;23(9):1351-1375.
36. Viswanathan M, Patnode CD, Berkman ND, et al. Recommendations for assessing the risk of bias in systematic reviews of health-care interventions. *Journal of clinical epidemiology*. 2018;97:26-34.
37. Riley RD, Moons KGM, Snell KIE, et al. A guide to systematic review and meta-analysis of prognostic factor studies. *BMJ*. 2019;364:k4597.
38. Hayden JA, van der Windt DA, Cartwright JL, Côté P, Bombardier C. Assessing bias in studies of prognostic factors. *Annals of internal medicine*. 2013;158(4):280-286.
39. Sterne JA, Hernán MA, Reeves BC, et al. ROBINS-I: a tool for assessing risk of bias in non-randomised studies of interventions. *BMJ*. 2016;355:i4919.
40. Langan D, Higgins JP, Jackson D, et al. A comparison of heterogeneity variance estimators in simulated random-effects meta-analyses. *Research synthesis methods*. 2019;10(1):83-98.
41. Hardy RJ, Thompson SG. A likelihood approach to meta-analysis with random effects. *Statistics in medicine*. 1996;15(6):619-629.
42. Mathur MB. Assessing robustness to worst case publication bias using a simple subset meta-analysis. *BMJ*. 2024;384.
43. Foroutan F, Guyatt G, Zuk V, et al. GRADE Guidelines 28: Use of GRADE for the assessment of evidence about prognostic factors: rating certainty in identification of groups of patients with different absolute risks. *Journal of clinical epidemiology*. 2020;121:62-70.
44. Balduzzi S, Rücker G, Schwarzer G. How to perform a meta-analysis with R: a practical tutorial. *BMJ Ment Health*. 2019;22(4):153-160.
45. Viechtbauer W. Conducting Meta-Analyses in R with the metafor Package. *Journal of Statistical Software*. 2010;36(3):1-48.
46. Hussein H, Nevill CR, Meffen A, Abrams KR, Bujkiewicz S, Sutton AJ, Gray LJ. Double-counting of populations in evidence synthesis in public health: a call for awareness and future methodological development. *BMC public health*. 2022;22(1):1827.
47. Aronne LJ, Sattar N, Horn DB, et al. Continued treatment with tirzepatide for maintenance of weight reduction in adults with obesity: the SURMOUNT-4 randomized clinical trial. *JAMA*. 2024;331(1):38-48.
48. Hori Y, Nakayama A, Sakamoto A. Surgery cancellations after entering the operating room. *JA Clinical Reports*. 2016;2:1-4.

49. Benhamou D, Catargi B, Cheisson G, Cosson E, Ichai C, Jacqueminet S, et al. Agonistes du récepteur du GLP1 (AR-GLP1) et dérivés, vidange gastrique et anesthésie. *Anesthésie & Réanimation*. 2023;9(5):510-511.
50. Kahl S. Hyperglykämie verstärkt die magenentleerungshemmende Wirkung von exogenem GLP-1. *Der Diabetologe*. 2015;11(5):413-414.
51. Silveira SQ, da Silva LM, Abib AdCV, de Moura DTH, de Moura EGH, Santos LB, et al. Relationship between perioperative semaglutide use and residual gastric content: A retrospective analysis of patients undergoing elective upper endoscopy. *Journal of Clinical Anesthesia*. 2023;87:111091.
52. Abu-Freha N, Levi Z, Nevo-Shor A, et al. The impact of glucagon-like peptide-1 receptor agonist on the gastric residue in upper endoscopy. *Diabetes Research and Clinical Practice*. 2024:111900.
53. Alkabbani W, Suissa K, Gu KD, et al. Glucagon-like peptide-1 receptor agonists before upper gastrointestinal endoscopy and risk of pulmonary aspiration or discontinuation of procedure: cohort study. *BMJ*. 2024;387:e080340.
54. Amini RAS, Ismail A-LS, Al-Aqrabawi M, et al. Risk of Aspiration Pneumonitis After Elective Esophagogastroduodenoscopy in Patients on Glucagon-Like Peptide-1 Receptor Agonists. *Cureus*. 2024;16(8).
55. Barlowe TS, Anderson C, Sandler RS, et al. Glucagon-like peptide-1 receptor agonists do not increase aspiration during upper endoscopy in patients with diabetes. *Clinical Gastroenterology and Hepatology*. 2024.
56. Bi D, Choi C, League J, Camilleri M, Prichard DO. Food residue during esophagogastroduodenoscopy is commonly encountered and is not pathognomonic of delayed gastric emptying. *Digestive diseases and sciences*. 2021;66:3951-9.
57. Buddhiraju A, Kagabo W, Khanuja HS, Oni JK, Nikkel LE, Hegde V. Decreased Risk of Readmission and Complications With Preoperative GLP-1 Analog Use in Patients Undergoing Primary Total Joint Arthroplasty. *Journal of Arthroplasty*. 2024.
58. Chapman MB, Norwood DA, Price C, et al. Effects of glucagon-like peptide-1 receptor agonists on gastric mucosal visibility and retained gastric contents during EGD. *Gastrointestinal Endoscopy*. 2024.
59. Elimihele TA, Mangrola AM, Oshomiji O, et al. Confounding Factors in the Association Between Glucagon-Like Peptide-1 Receptor Agonist Use and Retained Gastric Contents in Asymptomatic Patients Undergoing Upper Gastrointestinal Endoscopy: A Retrospective Study. *Cureus*. 2024;16(9):e69152.
60. Garza K, Aminpour E, Shah J, Mehta B, Early D, Gyawali CP, Kushnir V. Glucagon-Like Peptide-1 Receptor Agonists Increase Solid Gastric Residue Rates on Upper Endoscopy Especially in Patients With Complicated Diabetes: A Case-Control Study. *The American journal of gastroenterology*. 2024;119(6):1081-1088.
61. Jirapinyo P, Siranart N, Thompson CC. Glucagon-like peptide-1 receptor agonists and upper endoscopy: a real-world experience. *Obesity*. 2025.
62. Klonoff DC, Kim SH, Galindo RJ, et al. Risks of peri- and postoperative complications with glucagon-like peptide-1 receptor agonists. *Diabetes, Obesity and Metabolism*. 2024.
63. Kobori T, Onishi Y, Yoshida Y, et al. Association of glucagon-like peptide-1 receptor agonist treatment with gastric residue in an esophagogastroduodenoscopy. *Journal of Diabetes Investigation*. 2023;14(6):767-73.
64. Korlipara H, Chua J, Buckholz A, et al. Semaglutide is an Independent Predictor of Retained Solid Gastric Contents, but Same Day Colonoscopy Mitigates Effect. *Techniques and Innovations in Gastrointestinal Endoscopy*. 2024.

65. Nadeem D, Taye M, Still MD, et al. Effects of Glucagon-like Peptide-1 Receptor Agonists on Upper Endoscopy in Diabetic and Non-Diabetic Patients. *Gastrointestinal Endoscopy*. 2024.
66. Nasser J, Hosseini A, Barlow G, Gianchandani R, Rezaie A, Pimentel M, Mathur R. Food Retention at Endoscopy Among Adults Using Glucagon-Like Peptide-1 Receptor Agonists. *JAMA network open*. 2024;7(10):e2436783.
67. Nersessian RS, da Silva LM, Carvalho MAS, Silveira SQ, Abib AC, Bellicieri FN, et al. Relationship between residual gastric content and peri-operative semaglutide use assessed by gastric ultrasound: a prospective observational study. *Anaesthesia*. 2024;79(12):1317-1324.
68. Peng C-Y, Chang Y-C, Gong C, et al. Association between Glucagon-like Peptide-1 Receptor Agonists and Aspiration Pneumonia during Endoscopic Procedures. *Anesthesiology*. 2024;141(5):1009-1012.
69. Phan J, Chang P, Issa D, et al. Glucagon-Like Peptide Receptor Agonists Use before Endoscopy Is Associated with Low Retained Gastric Contents: A Multicenter Cross-Sectional Analysis. *American Journal of Gastroenterology*. 2024.
70. Pinto EF, Bastos ML, Prates CG, Sander GB, Bumaguin DB, Bagatini A. Assessment of residual gastric volume by ultrasound prior to upper endoscopy: a prospective cohort study. *Canadian Journal of Anesthesia/Journal canadien d'anesthésie*. 2024:1-9.
71. Santos LB, Mizubuti GB, da Silva LM, Silveira SQ, Nersessian RSF, Abib AdCV, et al. Effect of various perioperative semaglutide interruption intervals on residual gastric content assessed by esophagogastroduodenoscopy: a retrospective single center observational study. *Journal of Clinical Anesthesia*. 2024;99:111668.
72. Sen S, Potnuru PP, Hernandez N, Goehl C, Praestholm C, Sridhar S, Nwokolo OO. Glucagon-Like Peptide-1 Receptor Agonist Use and Residual Gastric Content Before Anesthesia. *JAMA surgery*. 2024.
73. Sherwin M, Hamburger J, Katz D, DeMaria Jr S. Influence of semaglutide use on the presence of residual gastric solids on gastric ultrasound: a prospective observational study in volunteers without obesity recently started on semaglutide. *Canadian Journal of Anesthesia/Journal canadien d'anesthésie*. 2023;70(8):1300-1306.
74. Stark JE, Cole JL, Ghazarian RN, Klass MJ. Impact of glucagon-like Peptide-1 receptor agonists (GLP-1RA) on food content during esophagogastroduodenoscopy (EGD). *Annals of Pharmacotherapy*. 2022;56(8):922-926.
75. Welk B, McClure JA, Carter B, Clarke C, Dubois L, Clemens KK. No association between semaglutide and postoperative pneumonia in people with diabetes undergoing elective surgery. *Diabetes, Obesity and Metabolism*. 2024.
76. Wu F, Smith MR, Mueller AL, Klapman SA, et al. Association of glucagon-like peptide receptor 1 agonist therapy with the presence of gastric contents in fasting patients undergoing endoscopy under anesthesia care: a historical cohort study. *Canadian Journal of Anesthesia/Journal canadien d'anesthésie*. 2024:1-9.
77. Yeo YH, Gaddam S, Ng WH, et al. Increased Risk of Aspiration Pneumonia Associated With Endoscopic Procedures Among Patients With Glucagon-like Peptide 1 Receptor Agonist Use. *Gastroenterology*. 2024.
78. Guyatt GH, Oxman AD, Sultan S, Glasziou P, Akl EA, Alonso-Coello P, et al. GRADE guidelines: 9. Rating up the quality of evidence. *Journal of clinical epidemiology*. 2011;64(12):1311-1316.

## Figure Captions

### Figure 1 . PRISMA Diagram

Caption:

Abbreviations: GLP-1 RA, Glucagon-Like Peptide-1 Receptor Agonist

### Figure 2a. Forest plot pulmonary aspiration

Caption:

Random-effects model method: restricted maximum likelihood heterogeneity variance estimator. The dark blue boxes represent individual study odds ratio, and the size of the boxes are proportional to study weight in the meta-analysis; the whiskers represent the confidence intervals; light blue diamond represents the overall pooled odds ratio and 95% CI; the dotted vertical line indicates the pooled OR. Event rates were not reported by Welk 2024. Abbreviations: GLP-1 RA, Glucagon-Like Peptide-1 Receptor Agonist.

### Figure 2b. Forest plot residual gastric contents

Caption:

Random-effects model method: restricted maximum likelihood heterogeneity variance estimator. The dark blue boxes represent individual study odds ratio, and the size of the boxes are proportional to study weight in the meta-analysis; the whiskers represent the confidence intervals; light blue diamond represents the overall pooled odds ratio and 95% CI; the dotted vertical line indicates the pooled OR. Event rates were not reported by Bi 2021 and Korlipara 2024. Abbreviations: GLP-1 RA, Glucagon-Like Peptide-1 Receptor Agonist.

### Figure 2c. Forest plot time since last dose

Caption:

Random-effects model method: restricted maximum likelihood heterogeneity variance estimator. The dark blue boxes represent individual study odds ratio, and the size of the boxes are proportional to study weight in the meta-analysis; the whiskers represent the confidence intervals; light blue diamond represents the overall pooled odds ratio and 95% CI; the dotted vertical line indicates the pooled OR. Abbreviations: GLP-1 RA, Glucagon-Like Peptide-1 Receptor Agonist.



## **Supporting Information captions**

### **Online Supporting Information Table S1**

Caption:

Abbreviations: DPP-4, dipeptidyl peptidase-4; GLP-1 RA, glucagon-like peptide-1 receptor agonist; QUIPS, Quality in Prognosis Studies; RGC, residual gastric contents; RoB 2, Revised Cochrane risk-of-bias tool for randomised trials, ROBINS-E, Risk Of Bias In Non-randomised Studies – Of Exposure; ROBINS-I, Risk Of Bias In Non-randomised Studies - of Interventions (ROBINS-I).

\*Preliminary findings from this study were presented in Silveira et al. 2023.<sup>51</sup>

### **Online Supporting Information Table S2**

Caption:

Abbreviations: EGD, Esophagogastroduodenoscopy; EMR, electronic medical record; ICD-9, International Classification of Diseases 9th Revision; ICD-10, International Classification of Diseases 10th Revision; ICD-10-CM, International Classification of Disease, Tenth Revision, and Clinical Modification; SNOMED, Systematized nomenclature of medicine; TKA, Total knee arthroplasty.

### **Online Supporting Information Table S3**

Caption:

Abbreviations: DGE, delayed gastric emptying; EGD, esophagogastroduodenoscopy; EMR, electronic medical record; GLP-1 RA, glucagon-like peptide-1 receptor agonist.

### **Online Supporting Information Table S3 (continued)**

Caption:

Abbreviations: EGD, esophagogastroduodenoscopy; EMR, electronic medical record; GLP-1 RA, glucagon-like peptide-1 receptor agonist; RGC, residual gastric contents.

### **Online Supporting Information Table S4**

Caption:

Abbreviations: GLP-1 RA, glucagon-like peptide-1 receptor agonist.

### **Online Supporting Information Table S5**

Caption:

Abbreviations: EGD, esophagogastroduodenoscopy; ERCP, endoscopic retrograde cholangiopancreatography; EUS, endoscopic ultrasound; GUS, gastric ultrasound; PA, pulmonary aspiration; RCT, Randomised controlled trial; RGC, residual gastric contents.

### **Online Supporting Information Table S6**

Caption:

Green indicates low risk of bias; Yellow indicates moderate risk of bias; Red indicates high risk of bias.

\* Studies were rated as low risk of bias if all or most of the 6 domains were marked as low; Studies were rated as moderate risk of bias if most of the 6 domains were marked as moderate and none were marked as high; Studies were rated as high risk of bias if at least one domain was marked as high.

#### **Online Supporting Information Table S7**

Caption:

Abbreviations: ASA-PS, American Society of Anesthesiologists Physical Status; BMI, Body mass index; CCB, Calcium channel blockers; CCI, Charlson comorbidity index; CKD, Chronic kidney disease; COPD, Chronic obstructive pulmonary disease; DPP-4, Dipeptidyl peptidase 4; GERD, Gastroesophageal reflux disease; GI, gastrointestinal; H2 blocker, Histamine type-2 receptor antagonists; MRA, Mineralocorticoid receptor antagonists; NA, Not applicable; NAFL, Non-alcoholic fatty liver disease; NASH, Non-alcoholic steatohepatitis; PPI, Proton pump inhibitor.

\* Studies marked as NA restricted their inclusion criteria to patients with diabetes.

#### **Online Supporting Information Table S8**

Caption:

Green indicates low risk of bias; Yellow indicates moderate risk of bias; Red indicates high risk of bias. Abbreviations: NA, not applicable.

\* Studies marked as NA due to acute presentation with residual gastric contents, therefore assessment of study attrition is not relevant.

† Studies were rated as low risk of bias if all or most of the 6 domains were marked as low; Studies were rated as moderate risk of bias if most of the 6 domains were marked as moderate and none were marked as high; Studies were rated as high risk of bias if at least one domain was marked as high.

#### **Online Supporting Information Table S9**

Caption:

Abbreviations: ASA-PS, American Society of Anesthesiologists physical status; BMI, Body mass index; CKD, Chronic kidney disease; EGD, Esophagogastroduodenoscopy; GLP-1 RA, Glucagon-like peptide-1 receptor agonist; HbA1C, Haemoglobin A1C; NA, Not applicable; NR, Not reported; PPI, Proton pump inhibitor.

\* Studies marked as NA restricted their inclusion criteria to patients with diabetes.

† Variables adjusted for in the multivariate logistic regression were not clearly reported.

‡ Propensity score matching was performed using the variables listed in the table. Variables adjusted for in the multivariate logistic regression were not clearly reported.

### Online Supporting Information Table S10

Caption:

Abbreviations: CI, confidence interval; GLP-1 RA, glucagon-like peptide-1 receptor agonist; NR, not reported; OR, odds ratio; PR, prevalence ratio.

\* Indicates patients who had their last GLP-1 RA dose either > 7 days (weekly doses) or >1 day (daily doses) prior to measurement of residual gastric contents.

† Indicates patients who had their last GLP-1 RA dose ≤ 7 days (weekly doses) or ≤ 1 day (single doses) prior to measurement of residual gastric contents.

‡ Patients who did not hold their GLP-1 RA prior to procedure were meta-analysed as the control group. Where appropriate, we took the inverse of published estimates to ensure consistency in the direction of the pooled effect estimates.

§ Study did not report effect estimates. Unadjusted odds ratio was calculated using the unadjusted event rates reported in the manuscript.

### Online Supporting Information Table S11

Caption:

Green indicates low risk of bias; Yellow indicates moderate risk of bias; Orange indicates serious risk of bias; Red indicates critical risk of bias; Grey indicates no information to form a judgement about risk of bias. Abbreviations: RGC, residual gastric contents.

\* Studies were rated as low risk of bias if all domains were marked as low; Studies were rated as moderate risk of bias if all domains are either low or moderate; Studies were rated as serious risk of bias if at least one domain was marked as serious, but not at critical risk of bias in any domain; Studies were rated as critical risk of bias if at least one domain was marked as critical.

### Online Supporting Information Figure S1

Caption:

Funnel plot for pulmonary aspiration outcome. Grey dots indicate point estimate and standard error for each of the included studies assessing pulmonary aspiration.

### Online Supporting Information Figure S2

Caption:

Subgroup analysis for pulmonary aspiration outcome comparing studies of patients with diabetes only to studies of patients with diabetes or another indication. Random-effects model method: restricted maximum likelihood heterogeneity variance estimator. The dark blue boxes represent individual study odds ratio, and the size of the boxes are proportional to study weight in the meta-analysis; the whiskers represent the confidence intervals; light blue diamond represents the overall pooled odds ratio and 95% CI; the dotted vertical line indicates the pooled OR. Abbreviations: GLP-1 RA, Glucagon-Like Peptide-1 Receptor Agonist.

### **Online Supporting Information Figure S3**

Caption:

Subgroup analysis for pulmonary aspiration outcome comparing studies of upper endoscopies to all other studies. Random-effects model method: restricted maximum likelihood heterogeneity variance estimator. The dark blue boxes represent individual study odds ratio, and the size of the boxes are proportional to study weight in the meta-analysis; the whiskers represent the confidence intervals; light blue diamond represents the overall pooled odds ratio and 95% CI; the dotted vertical line indicates the pooled OR. Abbreviations: GLP-1 RA, Glucagon-Like Peptide-1 Receptor Agonist.

### **Online Supporting Information Figure S4**

Caption:

Subgroup analysis for pulmonary aspiration outcome comparing studies limited to once-weekly formulations vs study not limited to once-weekly formulations. Random-effects model method: restricted maximum likelihood heterogeneity variance estimator. The dark blue boxes represent individual study odds ratio, and the size of the boxes are proportional to study weight in the meta-analysis; the whiskers represent the confidence intervals; light blue diamond represents the overall pooled odds ratio and 95% CI; the dotted vertical line indicates the pooled OR. Abbreviations: GLP-1 RA, Glucagon-Like Peptide-1 Receptor Agonist.

### **Online Supporting Information Figure S5**

Caption:

Funnel plot for residual gastric contents outcome. Grey dots indicate point estimate and standard error for each of the included studies assessing pulmonary aspiration.

### **Online Supporting Information Figure S6**

Caption:

Significance plot for residual gastric contents outcome. Grey dot indicates non-affirmative studies; orange dot indicates affirmative studies; black diamond indicates estimate from meta-analysis for all studies; grey diamond indicates sensitivity analysis of non-affirmative studies.

### **Online Supporting Information Figure S7**

Caption:

Sensitivity analysis of non-affirmative studies for residual gastric contents outcome. Random-effects model with restricted maximum likelihood heterogeneity variance estimator. The dark blue boxes represent individual study odds ratio, and the size of the boxes are proportional to study weight in the meta-analysis; the whiskers represent the confidence intervals; light blue diamond represents the overall pooled odds ratio and 95% CI; the dotted vertical line indicates the pooled OR. Adjusted

indicates adjusted ORs. Abbreviations: GLP-1 RA, Glucagon-Like Peptide-1 Receptor Agonist.

### **Online Supporting Information Figure S8**

Caption:

Subgroup analysis for residual gastric contents outcome comparing studies of upper endoscopies to all other studies. Random-effects model method: restricted maximum likelihood heterogeneity variance estimator. The dark blue boxes represent individual study odds ratio, and the size of the boxes are proportional to study weight in the meta-analysis; the whiskers represent the confidence intervals; light blue diamond represents the overall pooled odds ratio and 95% CI; the dotted vertical line indicates the pooled OR. Abbreviations: GLP-1 RA, Glucagon-Like Peptide-1 Receptor Agonist.

### **Online Supporting Information Figure S9**

Caption:

Subgroup analysis for residual gastric contents outcome comparing studies of patients with diabetes only to studies of patients with diabetes or another indication. Random-effects model method: restricted maximum likelihood heterogeneity variance estimator. The dark blue boxes represent individual study odds ratio, and the size of the boxes are proportional to study weight in the meta-analysis; the whiskers represent the confidence intervals; light blue diamond represents the overall pooled odds ratio and 95% CI; the dotted vertical line indicates the pooled OR. Abbreviations: GLP-1 RA, Glucagon-Like Peptide-1 Receptor Agonist.

### **Online Supporting Information Figure S10**

Caption:

Subgroup analysis for residual gastric contents outcome comparing studies limited to once-weekly formulations vs study not limited to once-weekly formulations. Random-effects model method: restricted maximum likelihood heterogeneity variance estimator. The dark blue boxes represent individual study odds ratio, and the size of the boxes are proportional to study weight in the meta-analysis; the whiskers represent the confidence intervals; light blue diamond represents the overall pooled odds ratio and 95% CI; the dotted vertical line indicates the pooled OR. Abbreviations: GLP-1 RA, Glucagon-Like Peptide-1 Receptor Agonist.

### **Online Supporting Information Figure S11**

Caption:

Funnel plot for studies assessing withholding at least one GLP-1 RA dose prior to a procedure on residual gastric contents. Grey dots indicate point estimate and standard error for each of the included studies assessing pulmonary aspiration.

### **Online Supporting Information Figure S12**

Caption:

Significance plot for studies assessing withholding at least one GLP-1 RA dose prior to a procedure on residual gastric contents. Grey dot indicates non-affirmative studies; orange dot indicates affirmative studies; black diamond indicates estimate from meta-analysis for all studies; grey diamond indicates sensitivity analysis of non-affirmative studies.

### **Online Supporting Information Figure S13**

Caption:

Sensitivity analysis of non-affirmative studies for studies assessing withholding at least one GLP-1 RA dose prior to a procedure on residual gastric contents. Random-effects model with restricted maximum likelihood heterogeneity variance estimator. The dark blue boxes represent individual study odds ratio, and the size of the boxes are proportional to study weight in the meta-analysis; the whiskers represent the confidence intervals; light blue diamond represents the overall pooled odds ratio and 95% CI; the dotted vertical line indicates the pooled OR. Adjusted indicates adjusted ORs. Abbreviations: GLP-1 RA, Glucagon-Like Peptide-1 Receptor Agonist.

### **Online Supporting Information Figure S14**

Caption:

Subgroup analysis for studies assessing withholding at least one GLP-1 RA dose prior to a procedure on residual gastric contents, comparing studies of upper endoscopies to all other studies. Random-effects model method: restricted maximum likelihood heterogeneity variance estimator. The dark blue boxes represent individual study odds ratio, and the size of the boxes are proportional to study weight in the meta-analysis; the whiskers represent the confidence intervals; light blue diamond represents the overall pooled odds ratio and 95% CI; the dotted vertical line indicates the pooled OR. Abbreviations: GLP-1 RA, Glucagon-Like Peptide-1 Receptor Agonist.

### **Online Supporting Information Figure S15**

Caption:

Subgroup analysis for studies assessing withholding at least one GLP-1 RA dose prior to a procedure on residual gastric contents, comparing studies limited to once-weekly formulations vs study not limited to once-weekly formulations. Random-effects model method: restricted maximum likelihood heterogeneity variance estimator. The dark blue boxes represent individual study odds ratio, and the size of the boxes are proportional to study weight in the meta-analysis; the whiskers represent the confidence intervals; light blue diamond represents the overall pooled odds ratio and 95% CI; the dotted vertical line indicates the pooled OR. Abbreviations: GLP-1 RA, Glucagon-Like Peptide-1 Receptor Agonist.



**Table 1. Characteristics of included studies**

| Study                         | Country       | Data collection | Study Design             | Sample Size, No. | Female, No. (%) | Diabetes, No. (%) | Population                | Exposure Arm                          | Outcome measured |
|-------------------------------|---------------|-----------------|--------------------------|------------------|-----------------|-------------------|---------------------------|---------------------------------------|------------------|
| Abu-Freha 2024 <sup>52</sup>  | Israel        | Retrospective   | Cohort / Cross-sectional | 120879           | 70444 (58%)     | 11293 (9%)        | EGD                       | Any GLP-1 RA                          | RGC              |
| Alkabbani 2024 <sup>53</sup>  | United States | Retrospective   | Cohort / Cross-sectional | 43354            | 27609 (64%)     | 43354 (100%)      | EGD                       | Any GLP-1 RA                          | PA               |
| Amini 2024 <sup>54</sup>      | United States | Retrospective   | Cohort / Cross-sectional | 118646           | 53796 (45%)     | 103070 (87%)      | EGD                       | Any GLP-1 RA                          | PA               |
| Barlowe 2024 <sup>55</sup>    | United States | Retrospective   | Cohort / Cross-sectional | 29526            | 16466 (56%)     | 29526 (100%)      | EGD                       | Any GLP-1 RA                          | PA               |
| Bi 2021 <sup>56</sup>         | United States | Retrospective   | Case-control             | 249              | NR              | NR                | EGD                       | Any GLP-1 RA                          | RGC              |
| Buddhiraju 2024 <sup>57</sup> | United States | Retrospective   | Cohort / Cross-sectional | 4190             | 2548 (61%)      | 2872 (69%)        | TKA                       | Any GLP-1 RA                          | PA               |
| Chapman 2024 <sup>58</sup>    | United States | Retrospective   | Cohort / Cross-sectional | 168              | 118 (70%)       | 144 (86%)         | EGD                       | Any GLP-1 RA                          | RGC              |
| Elimihele 2024 <sup>59</sup>  | United States | Retrospective   | Cohort / Cross-sectional | 3415             | 1609 (47%)      | NR                | EGD                       | Any GLP-1 RA                          | RGC              |
| Garza 2024 <sup>60</sup>      | United States | Retrospective   | Cohort / Cross-sectional | 612              | 303 (50%)       | 537 (88%)         | EGD                       | Any GLP-1 RA                          | RGC              |
| Jirapinyo 2025 <sup>61</sup>  | United States | Retrospective   | Cohort / Cross-sectional | 629              | 458 (73%)       | 291 (46%)         | EGD                       | Any GLP-1 RA                          | RGC              |
| Klonoff 2024 <sup>62</sup>    | United States | Retrospective   | Cohort / Cross-sectional | 2592             | 1677 (65%)      | 2592 (100%)       | Mixed surgical procedures | Any GLP-1 RA                          | PA               |
| Kobori 2023 <sup>63</sup>     | Japan         | Retrospective   | Cohort / Cross-sectional | 410              | 93 (23%)        | 410 (100%)        | EGD                       | Any GLP-1 RA                          | RGC              |
| Korlipara 2024 <sup>64</sup>  | United States | Retrospective   | Cohort / Cross-sectional | 1212             | 845 (70%)       | 555 (46%)         | EGD                       | Once-daily or once-weekly semaglutide | RGC              |
| Nadeem 2024 <sup>65</sup>     | United States | Retrospective   | Cohort / Cross-sectional | 35,183           | 20,749 (59%)    | 6163 (18%)        | EGD                       | Any GLP-1 RA                          | PA; RGC          |
| Nasser 2024 <sup>66</sup>     | United States | Retrospective   | Cohort / Cross-sectional | 209              | 108 (52%)       | 100 (48%)         | EGD                       | Any GLP-1 RA                          | RGC              |

Abbreviations: EGD, esophagogastroduodenoscopy; GLP-1 RA, glucagon-like peptide-1 receptor agonist; NR, not reported; PA, pulmonary aspiration; RGC, residual gastric contents; TKA, total knee arthroplasty.



**Table 1. Characteristics of included studies (continued)**

| Study                         | Country       | Data collection | Study Design             | Sample Size, No. | Female, No. (%) | Diabetes, No. (%) | Population                 | Exposure Arm                          | Outcome measured |
|-------------------------------|---------------|-----------------|--------------------------|------------------|-----------------|-------------------|----------------------------|---------------------------------------|------------------|
| Nersessian 2024 <sup>67</sup> | Brazil        | Prospective     | Cohort / Cross-sectional | 220              | 148 (67%)       | 0 (0%)            | Mixed surgical procedures  | Once-weekly semaglutide only          | RGC              |
| Peng 2024 <sup>68</sup>       | United States | Retrospective   | Cohort / Cross-sectional | 51378            | 31529 (61%)     | 39376 (77%)       | Mixed endoscopy procedures | Any GLP-1 RA                          | PA               |
| Phan 2024 <sup>69</sup>       | United States | Retrospective   | Cohort / Cross-sectional | 815              | 470 (58%)       | 672 (82%)         | EGD                        | Any GLP-1 RA                          | RGC              |
| Pinto 2024 <sup>70</sup>      | Brazil        | Prospective     | Cohort / Cross-sectional | 282              | NR              | NR                | EGD                        | Any GLP-1 RA                          | RGC              |
| Queiroz 2024                  | Brazil        | Prospective     | Cohort / Cross-sectional | 30               | 17 (57%)        | NR                | Healthy volunteers         | Once-weekly semaglutide only          | RGC              |
| Robalino Gonzaga 2024         | United States | Retrospective   | Cohort / Cross-sectional | 1046             | 675 (65%)       | 184 (17.6)        | EGD                        | Any GLP-1 RA                          | RGC              |
| Santos 2024 <sup>71*</sup>    | Brazil        | Retrospective   | Cohort / Cross-sectional | 1094             | 563 (52%)       | 120 (11%)         | EGD                        | Once-weekly semaglutide only          | PA; RGC          |
| Sen 2024 <sup>72</sup>        | United States | Prospective     | Cohort / Cross-sectional | 124              | 75 (60%)        | 59 (48%)          | Mixed surgical procedures  | Once-weekly GLP-1 RA only             | RGC              |
| Sherwin 2023 <sup>73</sup>    | United States | Prospective     | Cohort / Cross-sectional | 20               | 8 (40%)         | 1 (5%)            | Healthy volunteers         | Once-daily or once-weekly semaglutide | RGC              |
| Stark 2022 <sup>74</sup>      | United States | Retrospective   | Cohort / Cross-sectional | 177              | 17 (10%)        | 173 (98%)         | EGD                        | Any GLP-1 RA                          | RGC              |
| Welk 2024 <sup>75</sup>       | Canada        | Retrospective   | Cohort / Cross-sectional | 17905            | 7047 (39%)      | 17905 (100%)      | Mixed surgical procedures  | Once-weekly semaglutide only          | PA               |
| Wu 2024 <sup>76</sup>         | United States | Retrospective   | Cohort / Cross-sectional | 192              | 110 (57%)       | 87 (45%)          | EGD                        | Any GLP-1 RA                          | PA; RGC          |
| Yeo 2024 <sup>77</sup>        | United States | Retrospective   | Cohort / Cross-sectional | 31816            | 17753 (56%)     | 28823 (91%)       | EGD and/or colonoscopy     | Any GLP-1 RA                          | PA               |

Abbreviations: EGD, esophagogastroduodenoscopy; GLP-1 RA, glucagon-like peptide-1 receptor agonist; NR, not reported; PA, pulmonary aspiration; RGC, residual gastric contents.

\*Preliminary findings from this study were presented in Silveira et al. 2023.<sup>51</sup>

|                                               | <b>Pulmonary Aspiration</b> | <b>Residual gastric content</b> |
|-----------------------------------------------|-----------------------------|---------------------------------|
| Number of included studies                    | 11                          | 20                              |
| Number of patients                            | 335876                      | 166966                          |
| Sample size, Median (IQR)                     | 29526 (3391 - 39268)        | 346 (188 - 1058)                |
| <b>Publication year, No. (%)</b>              |                             |                                 |
| 2021                                          | 0 (0 %)                     | 1 (5 %)                         |
| 2022                                          | 0 (0 %)                     | 1 (5 %)                         |
| 2023                                          | 0 (0 %)                     | 2 (10 %)                        |
| 2024                                          | 11 (100 %)                  | 15 (75 %)                       |
| 2025                                          | 0 (0 %)                     | 1 (5 %)                         |
| <b>Country, No. (%)</b>                       |                             |                                 |
| Brazil                                        | 1 (9 %)                     | 4 (20 %)                        |
| Canada                                        | 1 (9 %)                     | 0 (0 %)                         |
| Israel                                        | 0 (0 %)                     | 1 (5 %)                         |
| Japan                                         | 0 (0 %)                     | 1 (5 %)                         |
| United States                                 | 9 (82 %)                    | 14 (70 %)                       |
| <b>Population, No. (%)</b>                    |                             |                                 |
| EGD                                           | 6 (55 %)                    | 15 (75 %)                       |
| EGD and/or colonoscopy                        | 1 (9 %)                     | 0 (0 %)                         |
| Mixed endoscopy procedures                    | 1 (9 %)                     | 1 (5 %)                         |
| Mixed surgical procedures                     | 2 (18 %)                    | 2 (10 %)                        |
| TKA                                           | 1 (9 %)                     | 0 (0 %)                         |
| Healthy volunteers                            | 0 (0 %)                     | 2 (10 %)                        |
| <b>Data collection, No. (%)</b>               |                             |                                 |
| Prospective                                   | 0 (0 %)                     | 5 (25 %)                        |
| Retrospective                                 | 11 (100 %)                  | 15 (75 %)                       |
| <b>Exposure type, No. (%)</b>                 |                             |                                 |
| Any GLP-1 RA                                  | 9 (82 %)                    | 14 (70 %)                       |
| Once-weekly GLP-1 RA only                     | 0 (0 %)                     | 1 (5 %)                         |
| Once-weekly semaglutide only                  | 2 (18 %)                    | 3 (15 %)                        |
| Once-daily or once-weekly semaglutide         | 0 (0 %)                     | 2 (10 %)                        |
| <b>Diabetes only sample, No. (%)</b>          |                             |                                 |
| Yes                                           | 4 (36 %)                    | 2 (10 %)                        |
| No                                            | 7 (64 %)                    | 18 (90 %)                       |
| <b>Assessed time since last dose, No. (%)</b> |                             |                                 |
| Yes                                           | 0 (0 %)                     | 5 (25 %)                        |
| No                                            | 11 (100 %)                  | 15 (75 %)                       |

**Table 2. Characteristics of included studies by outcome**

Percentages may not sum to exactly 100 due to rounding.

Abbreviations: EGD, esophagogastroduodenoscopy; GLP-1 RA, glucagon-like peptide-1 receptor agonist; TKA, total knee arthroplasty.

**Table 3. Summary of findings and GRADE assessment**

| Outcome                    | No. of patients (studies) | Event rate control | Event rate exposure | Relative effects (95% CI) | Absolute Risk difference (95%CI)        | Risk of bias    | Inconsistency | Indirectness | Imprecision | Publication bias | Large effects | Certainty of Evidence |
|----------------------------|---------------------------|--------------------|---------------------|---------------------------|-----------------------------------------|-----------------|---------------|--------------|-------------|------------------|---------------|-----------------------|
| Pulmonary aspiration*      | 304060 (9)‡               | 0.13% (218/170753) | 0.20% (263/133307)  | OR 1.04 (0.87 to 1.25)    | 1 more per 10,000 (2 fewer to 3 more)   | Serious ††      | Not serious   | Serious* **  | Not serious | Not serious      | No upgrade    | Low                   |
| Residual gastric contents* | 165522 (18)§              | 2.1% (3386/160834) | 10.0% (445/4439)    | OR 5.96 (3.96 to 8.98)    | 93 more per 1,000 (57 more to 141 more) | Very serious †† | Serious ¶¶    | Serious † †† | Not serious | Not serious      | Upgrade§§§    | Low                   |
| Time since last dose†      | 1706 (5)                  | 14.7% (157/1066) ¶ | 7.6% (51/670)**     | OR 0.51 (0.33 to 0.81)    | 7 fewer per 100 (9 fewer to 2 fewer)    | Very serious §§ | Not serious   | Serious † †† | Not serious | Not serious      | No upgrade    | Very Low              |

Not serious indicates that no reason was found, or the reason was not important enough to warrant downgrading the evidence; Serious indicates that the evidence is downgraded by one level; Very serious indicates that the evidence is downgraded by two levels; Upgrade indicates that the certainty of the evidence is increased by one level.

\* In line with GRADE recommendations for assessment of evidence about prognostic factors, we started with a high certainty in the evidence.<sup>38</sup>

† In line with GRADE recommendations for outcomes assessed with the ROBINS-I tool, we started with high certainty of evidence.<sup>74</sup>

‡ Three studies from the same administrative database assessed similar procedures. To avoid double-counting, the study with the lowest risk of bias across all six domains was included in the meta-analysis. Thus, only nine studies on pulmonary aspiration were included

§ One study did not report event rates for patients using GLP-1 RAs, therefore total number of patients is greater than the sum of control and exposure groups.

¶ Control group involves patient who did not hold their GLP-1 RA prior to procedure.

\*\* Exposure group involves patients who held their GLP-1 RA for at least one dose prior to procedure.

†† Overall bias was moderate or high across included studies. Concerns with incomplete or missing adjustment of confounders. Rated as serious, not very serious, since studies with a high risk of bias contributed minimally to the pooled estimate.

‡‡ Overall bias was predominantly high across included studies. Concerns with incomplete or missing adjustment of confounders, potential selection bias, and inadequate details regarding outcome measurement.

§§ Overall bias was serious across included studies. Concerns with potential confounding, participant selection, and inadequate details regarding outcome measurement.

¶¶ Downgraded because of substantial heterogeneity (I<sup>2</sup>=76%).

\*\*\* Downgraded because 6/9 limited to endoscopic procedures and 4/9 limited to patients with diabetes.

††† Downgraded because 14/18 limited to endoscopic procedures.

‡‡‡ Limited number of studies. 3/5 limited to upper endoscopy procedures.

§§§ Certainty of evidence is increased by two levels because the relative point estimate is >5.<sup>78</sup>

| Source          | GLP-1 RA Non-users |                 | GLP-1 RA Users |                 | Adjusted | OR   | 95% CI           | Weight |
|-----------------|--------------------|-----------------|----------------|-----------------|----------|------|------------------|--------|
|                 | No. of events      | No. of patients | No. of events  | No. of patients |          |      |                  |        |
| Alkabbani 2024  | 79                 | 18537           | 103            | 24817           | Yes      | 0.98 | [0.73; 1.31]     | 37.5%  |
| Barlowe 2024    | 10                 | 14407           | 7              | 15119           | Yes      | 0.68 | [0.26; 1.78]     | 3.4%   |
| Buddhiraju 2024 | 11                 | 2095            | 11             | 2095            | Yes      | 1.00 | [0.42; 2.39]     | 4.2%   |
| Klonoff 2024    | 9                  | 1296            | 7              | 1296            | Yes      | 0.78 | [0.29; 2.09]     | 3.3%   |
| Nadeem 2024     | 1                  | 34261           | 0              | 922             | No       | 0.49 | [0.00; 96866.73] | 0.0%   |
| Peng 2024       | 108                | 25689           | 123            | 25689           | Yes      | 1.14 | [0.88; 1.47]     | 48.7%  |
| Santos 2024     | 0                  | 971             | 1              | 123             | No       | 9.98 | [0.61; 163.36]   | 0.4%   |
| Welk 2024       | .                  | 14072           | .              | 3833            | Yes      | 0.78 | [0.22; 2.74]     | 2.0%   |
| Wu 2024         | 0                  | 102             | 1              | 90              | No       | 3.17 | [0.14; 74.01]    | 0.3%   |
| Total           |                    |                 |                |                 |          | 1.04 | [0.87; 1.25]     | 100.0% |

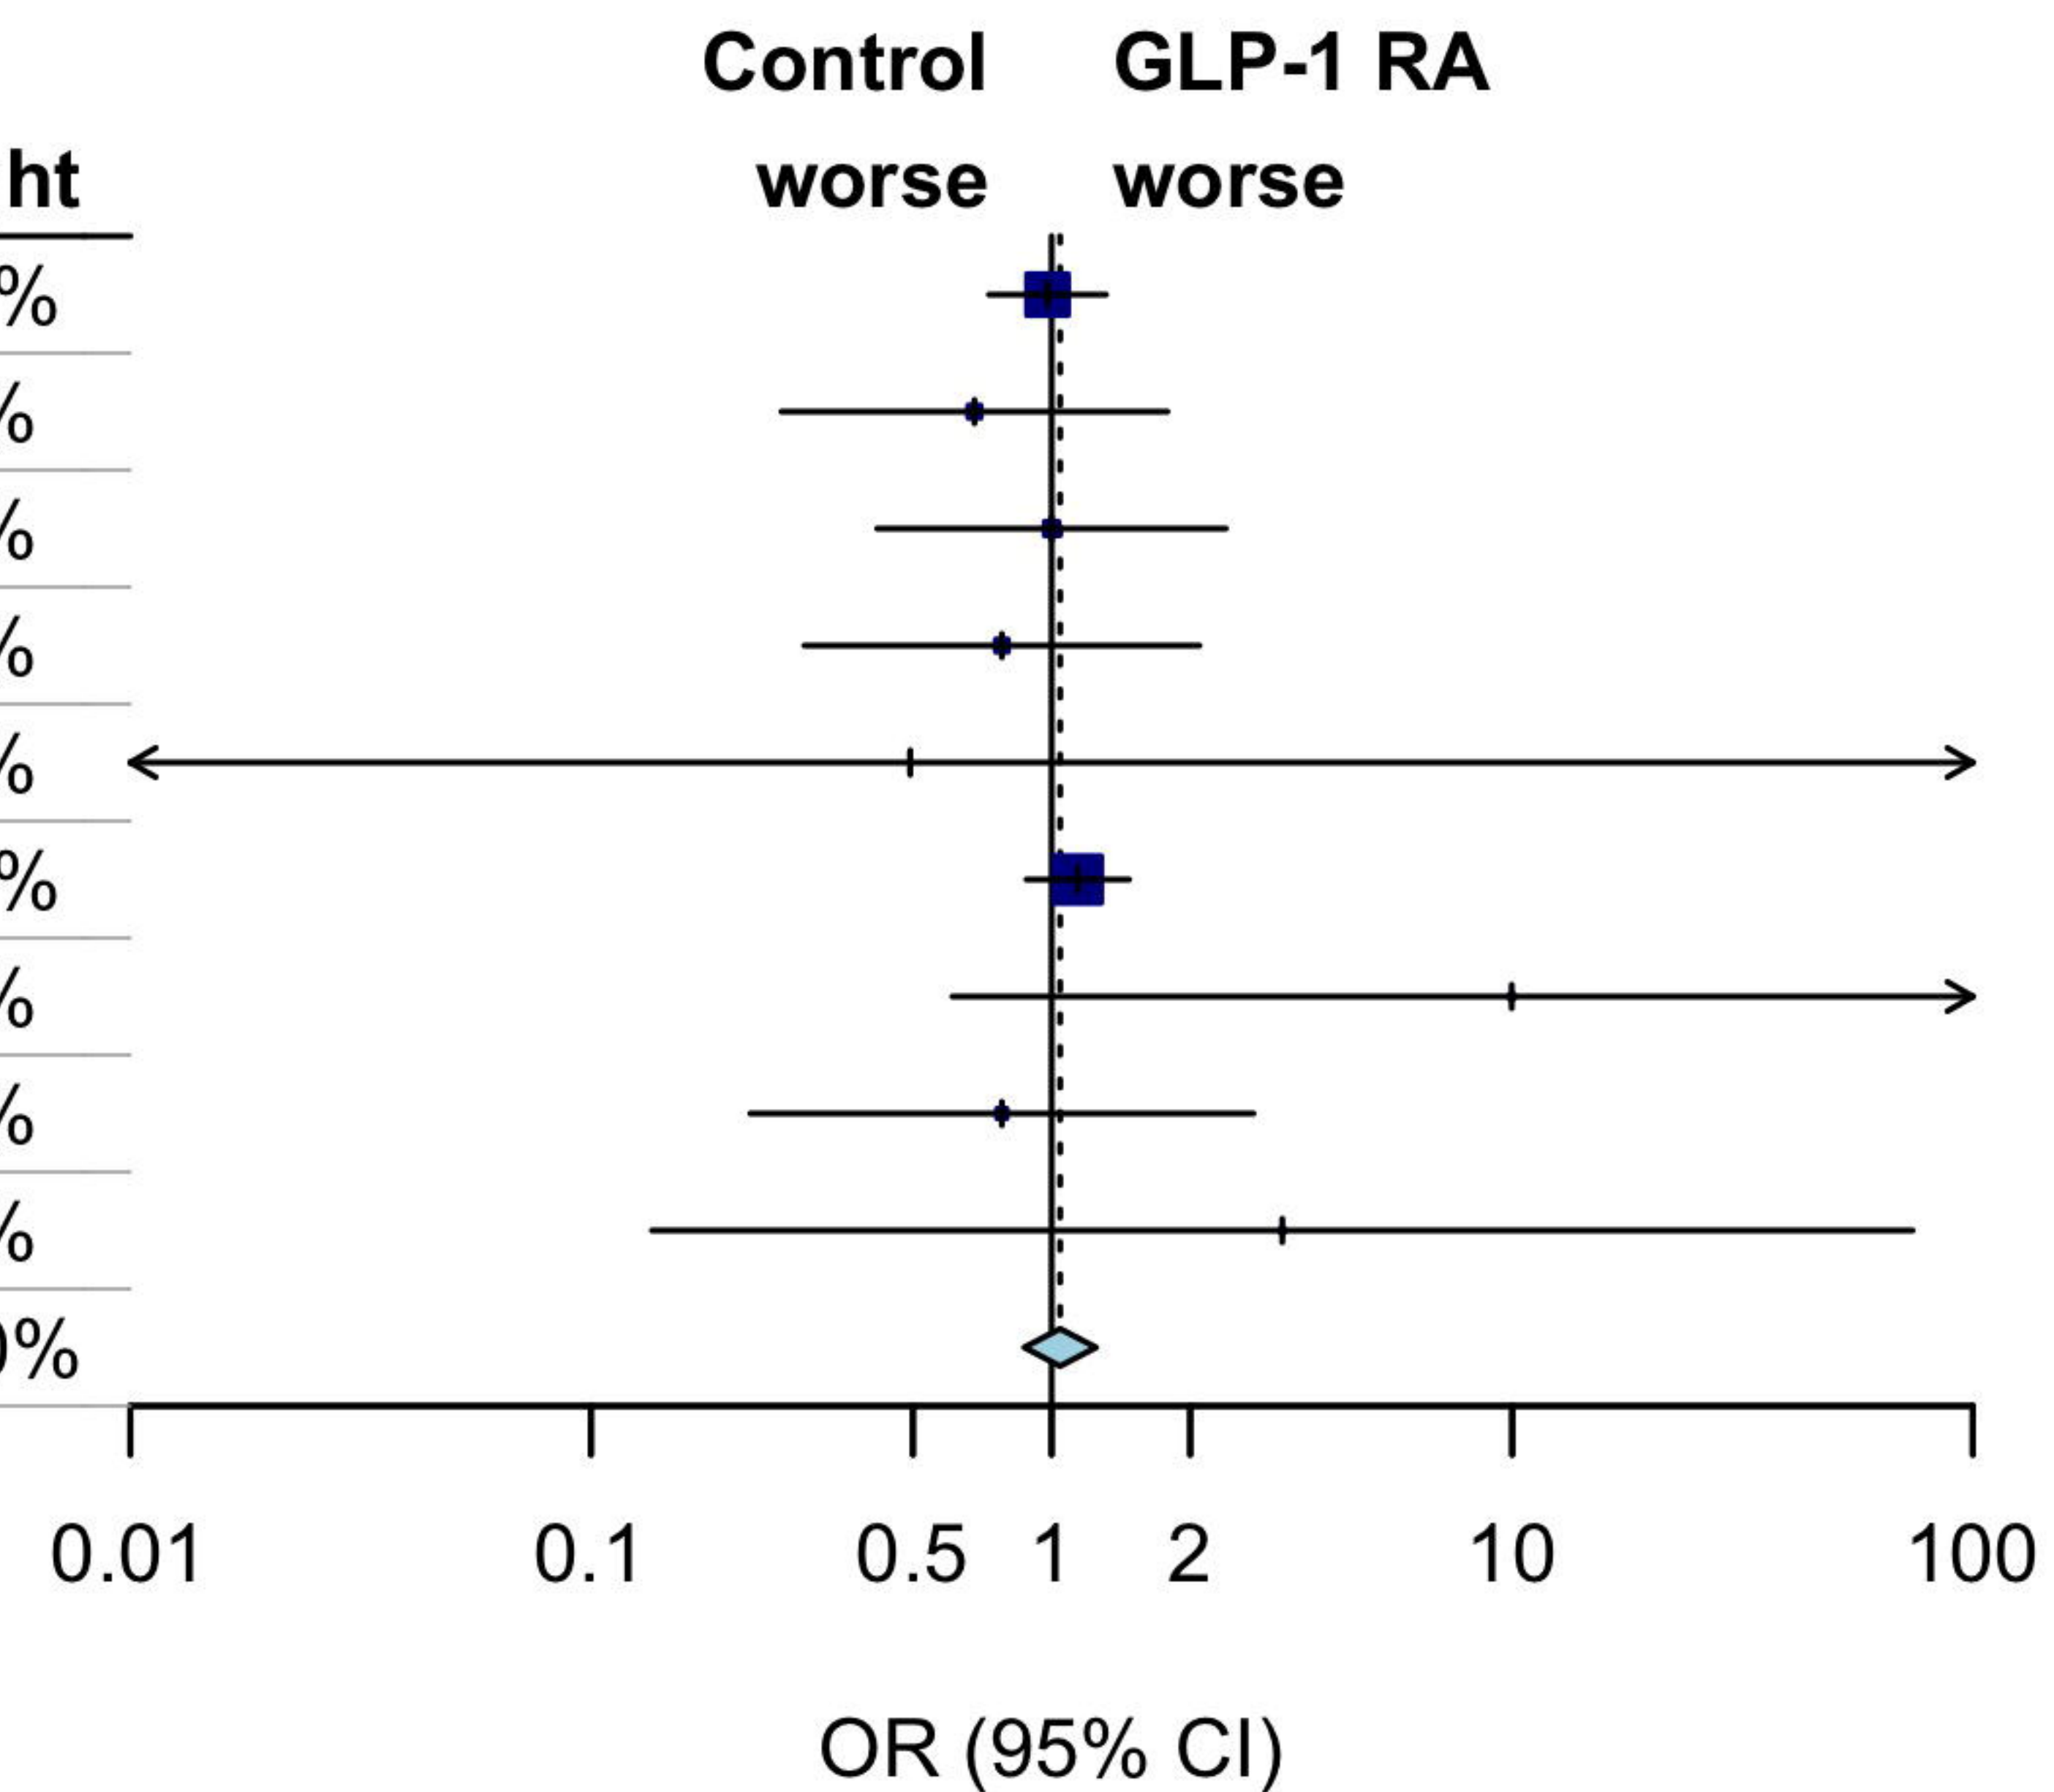

Heterogeneity:  $\chi^2_8 = 4.94$  ( $P = .76$ ),  $I^2 = 0\%$

Test for overall effect:  $z = 0.47$  ( $P = .64$ )

| Source                | GLP-1 RA Non-users |                 | GLP-1 RA Users |                 | Adjusted | OR    | 95% CI           | Weight |
|-----------------------|--------------------|-----------------|----------------|-----------------|----------|-------|------------------|--------|
|                       | No. of events      | No. of patients | No. of events  | No. of patients |          |       |                  |        |
| Abu-Freha 2024        | 2372               | 119208          | 93             | 1671            | Yes      | 2.13  | [ 1.70; 2.68]    | 10.5%  |
| Bi 2021               | .                  | .               | .              | .               | Yes      | 5.30  | [ 0.52; 54.15]   | 2.4%   |
| Chapman 2024          | 4                  | 84              | 11             | 84              | Yes      | 4.62  | [ 1.21; 17.60]   | 5.0%   |
| Elimihele 2024        | 126                | 3381            | 3              | 34              | No       | 2.50  | [ 0.75; 8.31]    | 5.6%   |
| Garza 2024            | 12                 | 306             | 43             | 306             | Yes      | 4.35  | [ 2.21; 8.57]    | 8.4%   |
| Kobori 2023           | 1                  | 205             | 11             | 205             | Yes      | 11.57 | [ 1.48; 90.44]   | 2.9%   |
| Korlipara 2024        | .                  | 610             | .              | 602             | Yes      | 4.74  | [ 2.40; 9.36]    | 8.4%   |
| Nadeem 2024           | 788                | 34261           | 125            | 922             | Yes      | 4.08  | [ 3.25; 5.12]    | 10.5%  |
| Nasser 2024           | 0                  | 139             | 4              | 70              | Yes      | 18.88 | [ 1.00; 355.81]  | 1.7%   |
| Nersessian 2024       | 3                  | 113             | 43             | 107             | Yes      | 36.97 | [15.09; 90.59]   | 7.1%   |
| Pinto 2024            | 13                 | 276             | 1              | 6               | No       | 4.05  | [ 0.44; 37.18]   | 2.6%   |
| Queiroz 2024          | 1                  | 15              | 11             | 15              | No       | 38.50 | [ 3.75; 395.41]  | 2.4%   |
| Robalino Gonzaga 2024 | 15                 | 973             | 10             | 73              | Yes      | 9.19  | [ 2.74; 30.88]   | 5.6%   |
| Santos 2024           | 31                 | 971             | 25             | 123             | No       | 7.73  | [ 4.38; 13.66]   | 9.0%   |
| Sen 2024              | 12                 | 62              | 35             | 62              | Yes      | 4.16  | [ 1.60; 10.82]   | 6.8%   |
| Sherwin 2023          | 1                  | 10              | 9              | 10              | No       | 81.00 | [ 4.36; 1504.46] | 1.7%   |
| Stark 2022            | 2                  | 118             | 4              | 59              | Yes      | 4.22  | [ 0.87; 20.40]   | 4.2%   |
| Wu 2024               | 5                  | 102             | 17             | 90              | Yes      | 6.30  | [ 1.73; 22.88]   | 5.2%   |
| Total                 |                    |                 |                |                 |          | 5.96  | [ 3.96; 8.98]    | 100.0% |

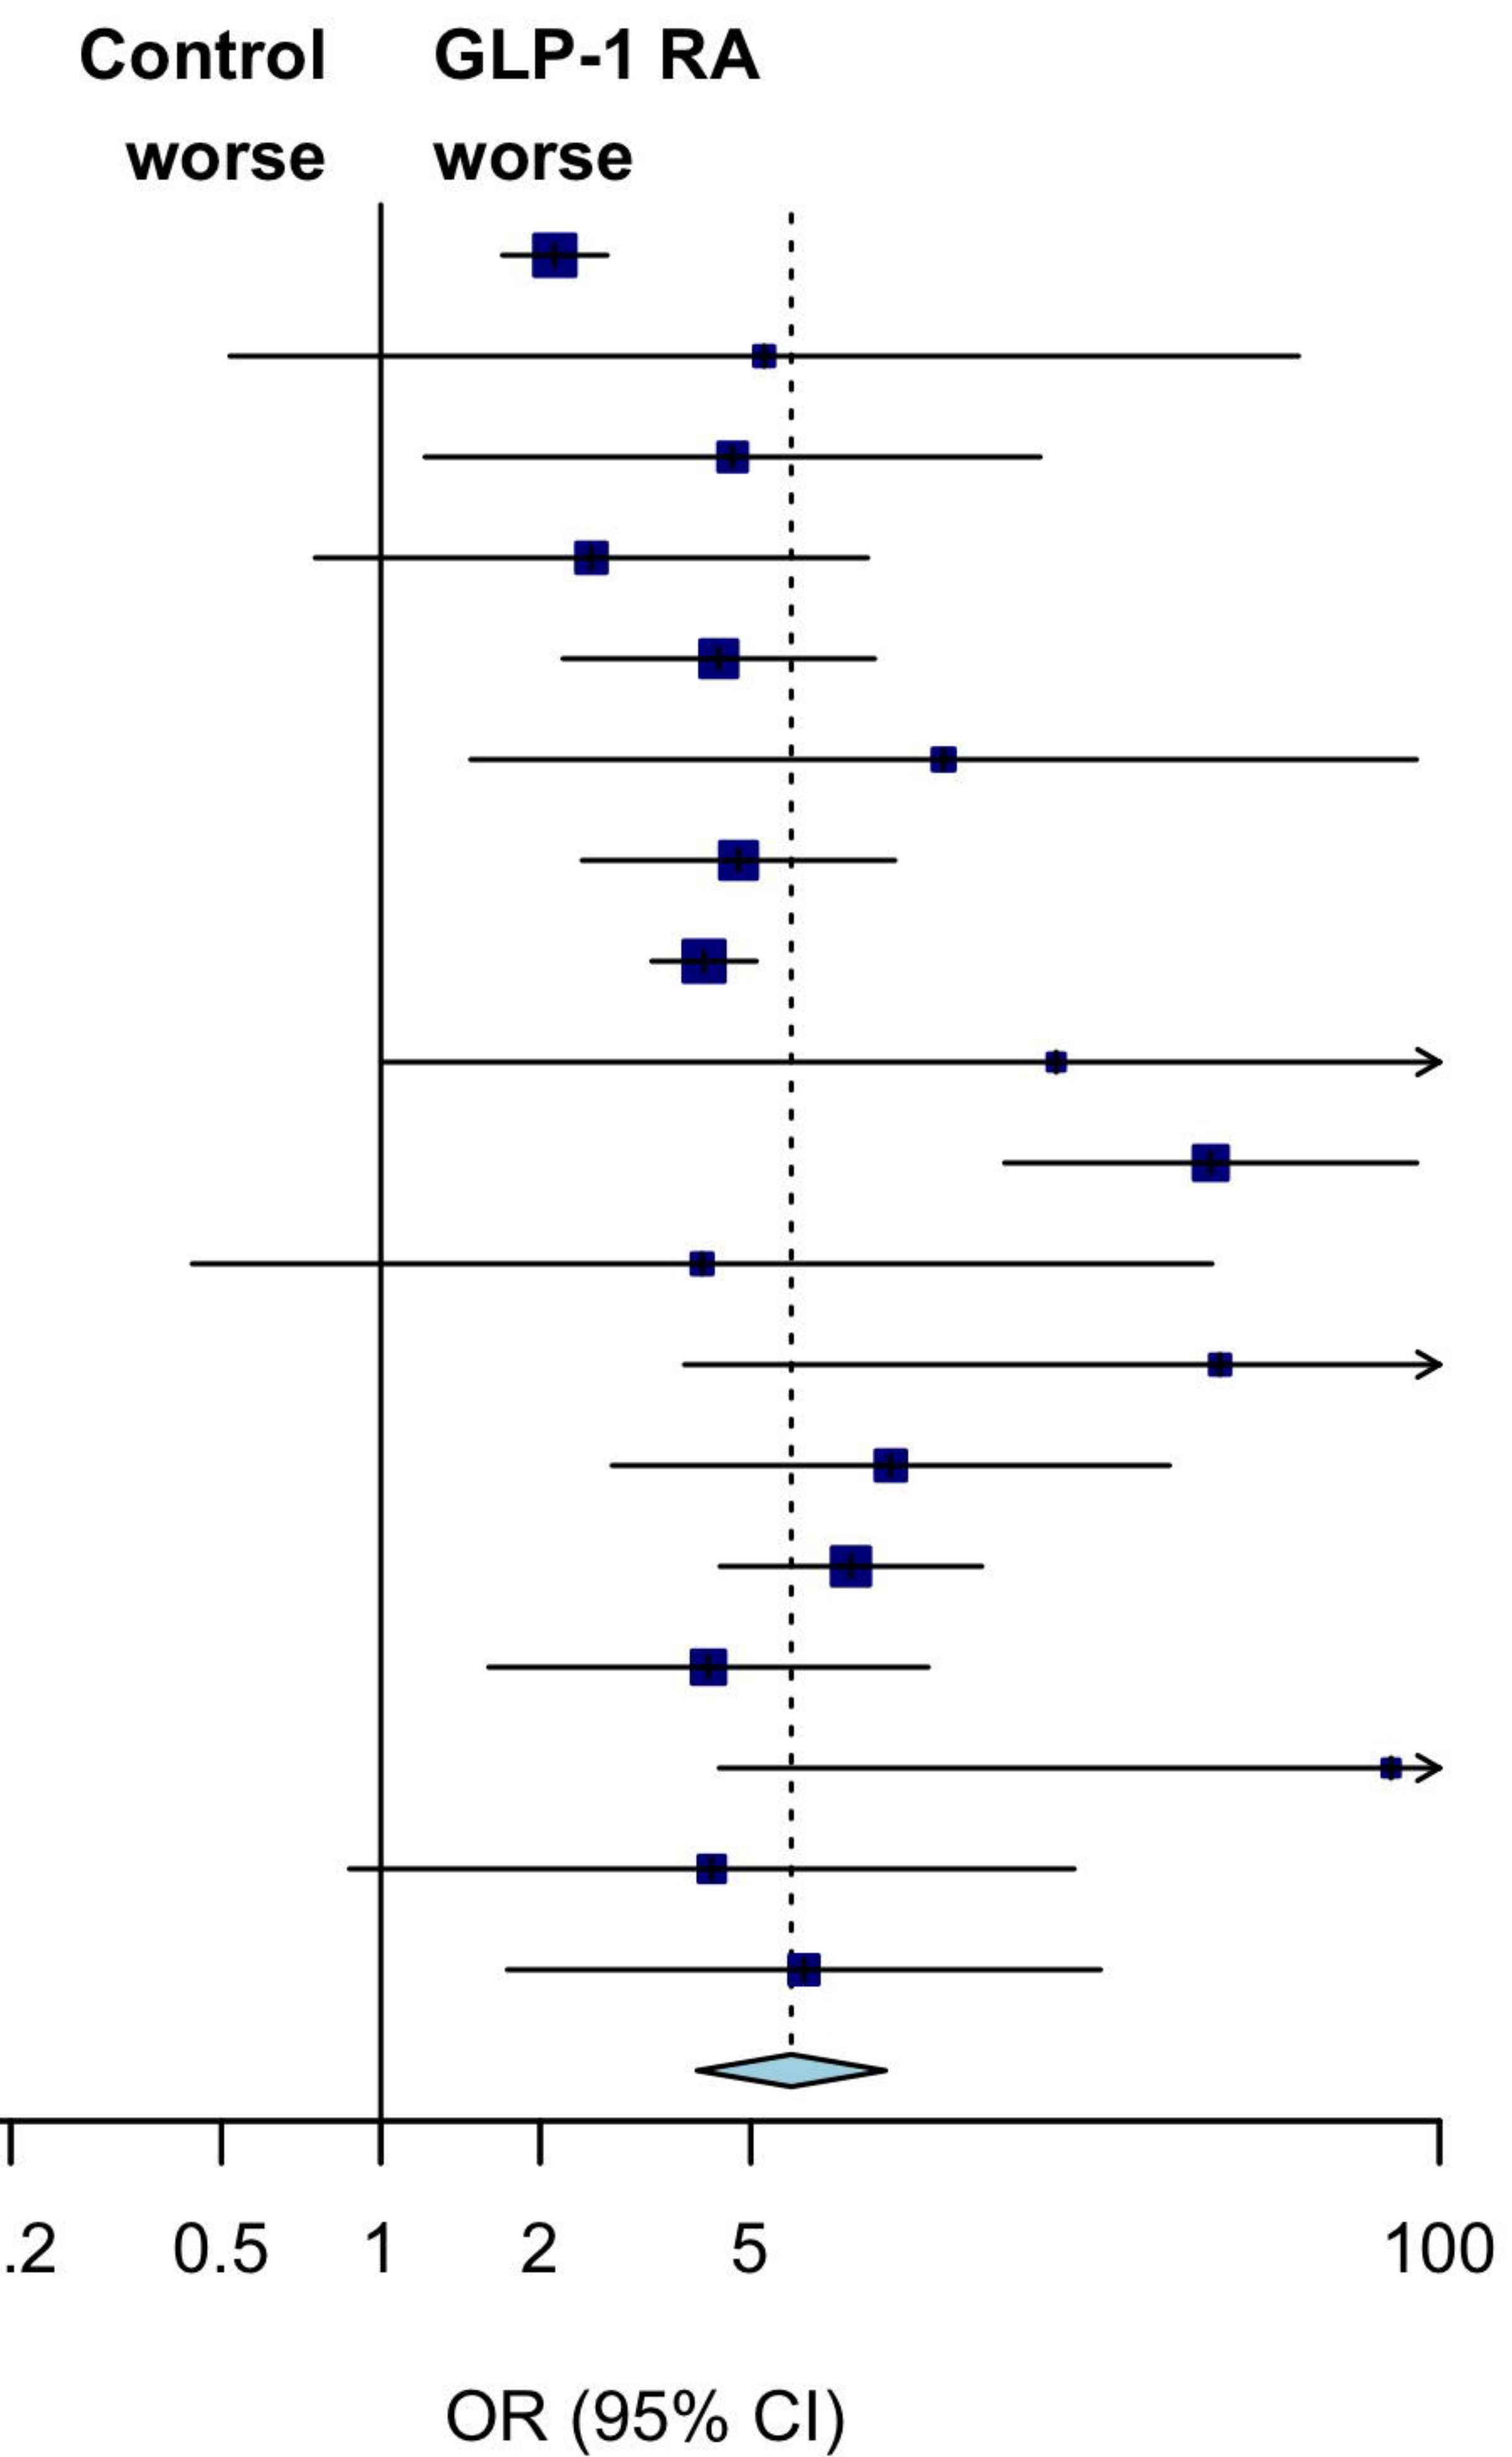

Heterogeneity:  $\chi^2_{17} = 69.79$  ( $P < .001$ ),  $I^2 = 76\%$   
 Test for overall effect:  $z = 8.54$  ( $P < .001$ )

| Source          | GLP-1 RA not held |                 | GLP-1 RA held |                 | Adjusted OR | 95% CI             | Weight |
|-----------------|-------------------|-----------------|---------------|-----------------|-------------|--------------------|--------|
|                 | No. of events     | No. of patients | No. of events | No. of patients |             |                    |        |
| Jirapinyo 2025  | 31                | 483             | 4             | 146             | No          | 0.41 [0.14; 1.18]  | 16.6%  |
| Nersessian 2024 | 36                | 87              | 7             | 20              | No          | 0.76 [0.27; 2.14]  | 17.2%  |
| Phan 2024       | 52                | 409             | 18            | 406             | Yes         | 0.35 [0.19; 0.64]  | 41.4%  |
| Santos 2024     | 8                 | 32              | 17            | 91              | No          | 0.69 [0.26; 1.80]  | 19.7%  |
| Sen 2024        | 30                | 55              | 5             | 7               | Yes         | 2.15 [0.29; 15.86] | 5.1%   |
| Total           |                   |                 |               |                 |             | 0.51 [0.33; 0.81]  | 100.0% |

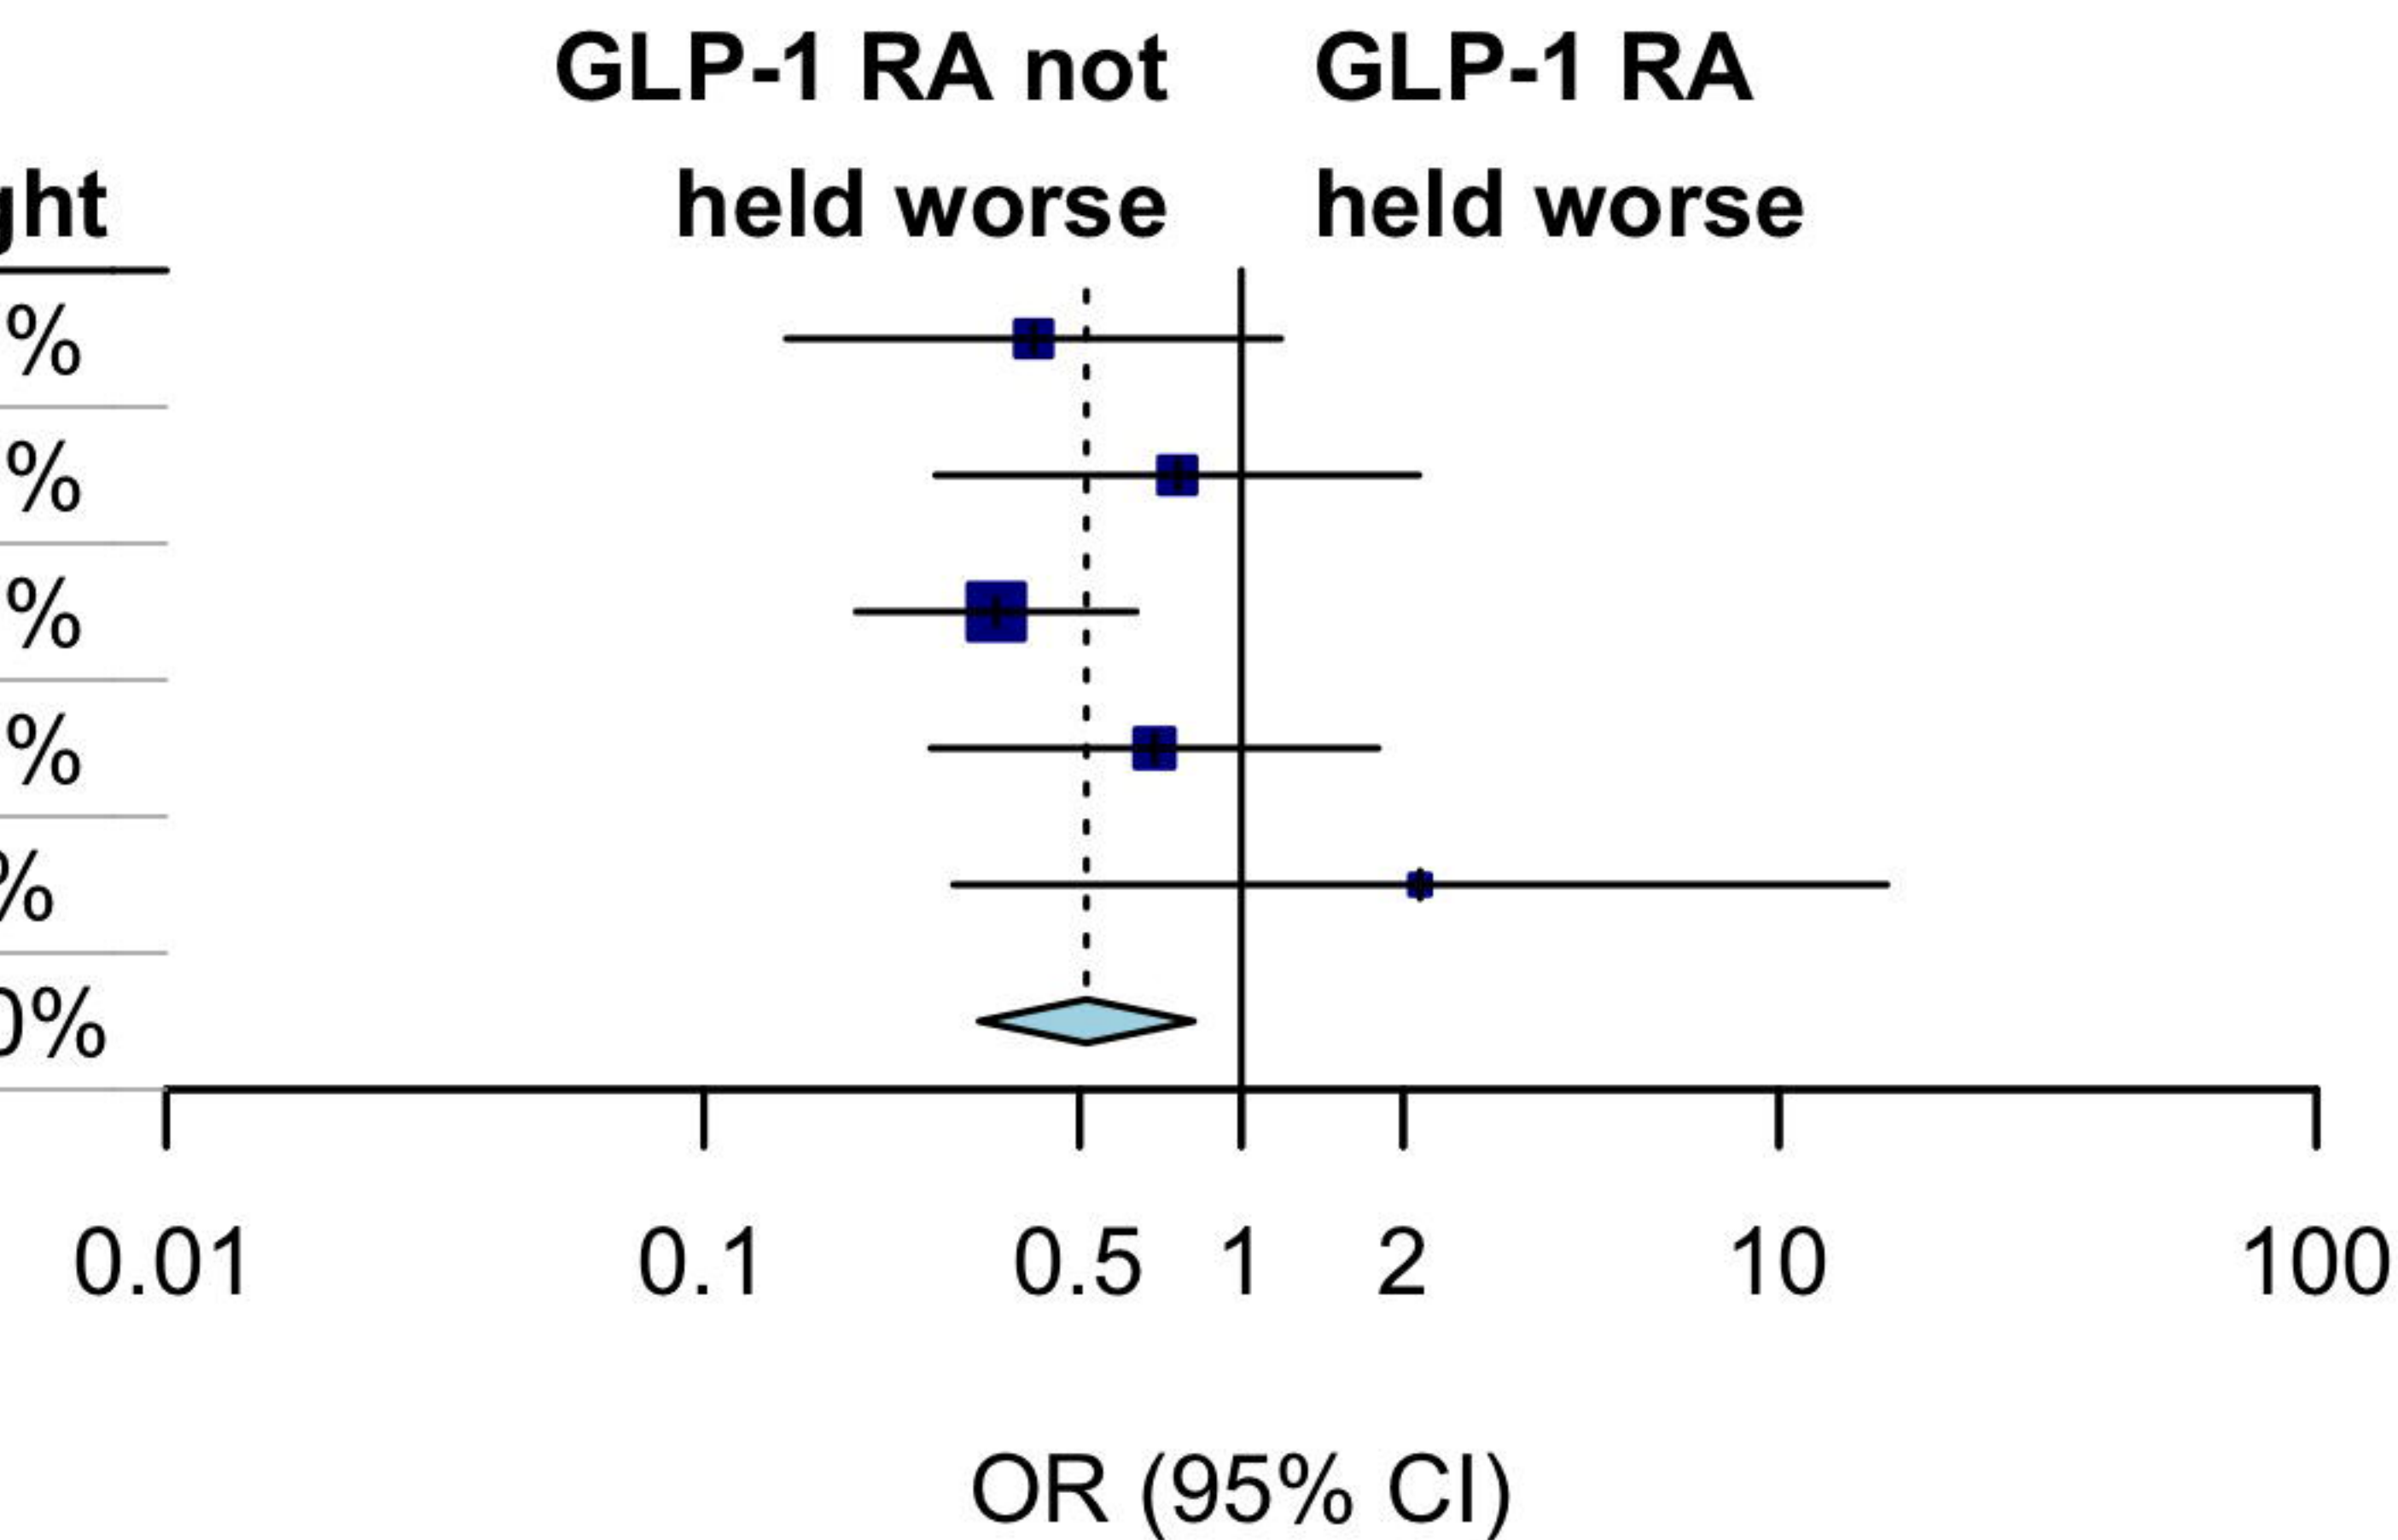

Heterogeneity:  $\chi^2_4 = 4.60$  ( $P = .33$ ),  $I^2 = 13\%$

Test for overall effect:  $z = -2.84$  ( $P = .005$ )
